# Supplementary material for: Whole Genome Targeted Enrichment and Sequencing of Human-Infecting Cryptosporidium spp.
Source: Research Square preprint supplement (doi:10.21203/rs.3.rs-4294842/v1), 2024-05-17
Supplement: Supplementary file 1 [file 0b2b6e9aec4e76aa38749534.xlsx]

## Sheet: clinical_samples_iTru_summary_s
Library	Sample	Label	RawReadPairs	Trimmed_Reads	MappedPairedReads10RefGenomes	PerMapPairedReads10RefGenomes	Fold_Change
Enriched	DOCK1	Crypto_12	249152	241114	4082	1.69	84.5	53.0583
Enriched	DOCK2	Crypto_13	33835	32413	2759	8.51	56.7333
Enriched	DOCK3	Crypto_14	154793	146627	3617	2.47	61.75
Enriched	DOCK4	Crypto_15	152018	144675	533	0.37	9.25
Enriched	UKH101	Crypto_16	116643	111719	10708	9.58	479	465.083
Enriched	UKP196	Crypto_17	88713	84616	15375	18.17	454.25
Enriched	EC4	Crypto_18	22144	20870	1928	9.24	462
Unenriched	DOCK1	Crypto_30	491800	459002	93	0.02
Unenriched	DOCK2	Crypto_31	38066	34311	50	0.15
Unenriched	DOCK3	Crypto_32	273243	237671	93	0.04
Unenriched	DOCK4	Crypto_33	348325	313481	132	0.04
Unenriched	UKH101	Crypto_34	257068	233483	54	0.02
Unenriched	UKP196	Crypto_35	112202	102832	45	0.04
Unenriched	EC4	Crypto_36	31681	28579	7	0.02
	Enriched		169263
	Uneriched		#DIV/0!
			2369683
			22144
			0
			0
			0
