# Supplementary material for: Whole Genome Targeted Enrichment and Sequencing of Human-Infecting Cryptosporidium spp.
Source: Research Square preprint supplement (doi:10.21203/rs.3.rs-4294842/v1), 2024-05-17
Supplement: Supplementary file 2 [file 1a8d18463b1e91e1a9b3c151.xlsx]

## Sheet: Sheet1
New_label	Label	Sample	Library	Library-Bait-dilution	Species	Species_Category	Pool	Category	Start_Amount_of_Cmeleagridis_DNA_ng	Start_Amount_of_Cparvum_DNA_ng	Bait_Dilution	Raw_Read_Pairs	Trim_Read_Pairs	Number_of_hundred_thousand_paired_reads	Mapped_Paired_Reads_Cparvum	Per_Map_Paired_Reads_Cparvum	Average_Depth_Cparvum	Normalized_Depth_Cparvum	Average_Breadth_Cparvum	Normalized_Breadth	Mapped_Paired_Reads_10_genomes	Per_Map_Paired_Read_10_genomes
U_G4	U_A4	A4	Unenriched	Unenriched	C_parvum	C_parvum_G	4	G	0	0	03_Unenriched	2926046	2641643	26.4164	90	0	0.035	0.00132493	0.11	0.00416408	148	0.01
U_E4	U_B4	B4	Unenriched	Unenriched	C_parvum	C_parvum_E	4	E	0	0.0001	03_Unenriched	2863712	2531450	25.3145	94	0	0.005	0.000197515	0.07	0.00276521	156	0.01
U_D4	U_C4	C4	Unenriched	Unenriched	C_parvum	C_parvum_D	4	D	0	0.001	03_Unenriched	2293690	2013084	20.1308	75	0	0.004	0.0001987	0.07	0.00347725	124	0.01
U_C4	U_D4	D4	Unenriched	Unenriched	C_parvum	C_parvum_C	4	C	0	0.01	03_Unenriched	1435280	1142229	11.4223	119	0.01	0.004	0.000350192	0.2	0.0175096	136	0.01
U_B4	U_E4	E4	Unenriched	Unenriched	C_parvum	C_parvum_B	4	B	0	0.1	03_Unenriched	3256695	2874868	28.7487	1804	0.06	0.059	0.00205227	4.03	0.14018	1860	0.06
U_A4	U_F4	F4	Unenriched	Unenriched	C_parvum	C_parvum_A	4	A	0	1	03_Unenriched	405436	360755	3.60755	2115	0.59	0.067	0.0185722	4.83	1.33886	2120	0.59
S_G1	S_A1	A1	Single	Single-One-quarter	C_parvum	C_parvum_G	1	G	0	0	01_Quarter	3311008	2387831	23.8783	1948	0.08	0.1	0.0041879	0	0	6661	0.28
S_E1	S_B1	B1	Single	Single-One-quarter	C_parvum	C_parvum_E	1	E	0	0.0001	01_Quarter	3682528	2641523	26.4152	3848	0.15	0.15	0.00567854	1.56	0.0590568	10011	0.38
S_D1	S_C1	C1	Single	Single-One-quarter	C_parvum	C_parvum_D	1	D	0	0.001	01_Quarter	3826360	2738929	27.3893	19108	0.7	0.43	0.0156996	9.53	0.347946	25872	0.94
S_C1	S_D1	D1	Single	Single-One-quarter	C_parvum	C_parvum_C	1	C	0	0.01	01_Quarter	2896747	2070360	20.7036	101686	4.91	2.08	0.100466	41.4	1.99965	107717	5.2
S_B1	S_E1	E1	Single	Single-One-quarter	C_parvum	C_parvum_B	1	B	0	0.1	01_Quarter	4689915	3504820	35.0482	1140387	32.54	22.8	0.650533	97.57	2.78388	1145551	32.69
S_A1	S_F1	F1	Single	Single-One-quarter	C_parvum	C_parvum_A	1	A	0	1	01_Quarter	17806840	14099031	140.99	9850572	69.87	237.65	1.68558	99.98	0.709127	12074241	85.64
S_G4	S_A4	A4	Single	Single-One-eighth	C_parvum	C_parvum_G	4	G	0	0	02_Eighth	7720902	5762850	57.6285	1416	0.02	0.08	0.0013882	0.05	0.000867626	5953	0.1
S_E4	S_B4	B4	Single	Single-One-eighth	C_parvum	C_parvum_E	4	E	0	0.0001	02_Eighth	6921958	5183639	51.8364	2255	0.04	0.09	0.00173623	0.7	0.013504	6076	0.12
S_D4	S_C4	C4	Single	Single-One-eighth	C_parvum	C_parvum_D	4	D	0	0.001	02_Eighth	5538791	4138676	41.3868	4662	0.11	0.12	0.00289948	1.82	0.0439754	8499	0.21
S_C4	S_D4	D4	Single	Single-One-eighth	C_parvum	C_parvum_C	4	C	0	0.01	02_Eighth	5602833	4022041	40.2204	44723	1.11	0.95	0.0236198	17.5	0.435102	48593	1.21
S_B4	S_E4	E4	Single	Single-One-eighth	C_parvum	C_parvum_B	4	B	0	0.1	02_Eighth	7178985	5407286	54.0729	628036	11.61	12.4	0.22932	84.69	1.56622	631331	11.68
S_A4	S_F4	F4	Single	Single-One-eighth	C_parvum	C_parvum_A	4	A	0	1	02_Eighth	2579660	2030673	20.3067	1171193	57.68	22.45	1.10554	94.08	4.63295	1169787	57.61
S_G8	S_A8	A8	Single	Single-One-eighth	C_parvum	C_parvum_G	8	G	0	0	02_Eighth	7009890	5090597	50.906	1940	0.04	0.11	0.00216085	0.5	0.00982203	7376	0.14
S_E8	S_B8	B8	Single	Single-One-eighth	C_parvum	C_parvum_E	8	E	0	0.0001	02_Eighth	4927043	3522350	35.2235	4059	0.12	0.16	0.00454242	1.12	0.031797	8209	0.23
S_D8	S_C8	C8	Single	Single-One-eighth	C_parvum	C_parvum_D	8	D	0	0.001	02_Eighth	5415018	3979089	39.7909	11770	0.3	0.29	0.0072881	3.85	0.0967558	18061	0.45
S_C8	S_D8	D8	Single	Single-One-eighth	C_parvum	C_parvum_C	8	C	0	0.01	02_Eighth	7225780	5254465	52.5446	129141	2.46	2.49	0.0473883	36.16	0.688177	136410	2.6
S_B8	S_E8	E8	Single	Single-One-eighth	C_parvum	C_parvum_B	8	B	0	0.1	02_Eighth	7625593	5707821	57.0782	1027314	18	20.22	0.354251	91.76	1.60762	1031738	18.08
D_G4	D_A4	A4	Double	Double-One-eighth	C_parvum	C_parvum_A	4	G	0	0	02_Eighth	373551	347550	3.4755	71	0.02	0	0	0.05	0.0143864	406	0.12
D_E4	D_B4	B4	Double	Double-One-eighth	C_parvum	C_parvum_G	4	E	0	0.0001	02_Eighth	396917	367045	3.67045	2711	0.74	0.09	0.0245202	4.66	1.2696	3010	0.82
D_D4	D_C4	C4	Double	Double-One-eighth	C_parvum	C_parvum_E	4	D	0	0.001	02_Eighth	293525	272726	2.72726	3149	1.15	0.11	0.0403335	0.19	0.069667	3372	1.24
D_C4	D_D4	D4	Double	Double-One-eighth	C_parvum	C_parvum_D	4	C	0	0.01	02_Eighth	246224	216600	2.166	21744	10.04	0.73	0.337027	1.61	0.743306	21868	10.1
D_B4	D_E4	E4	Double	Double-One-eighth	C_parvum	C_parvum_C	4	B	0	0.1	02_Eighth	1269358	1165170	11.6517	804806	69.07	26.85	2.30438	22.3	1.91388	804351	69.03
D_A4	D_F4	F4	Double	Double-One-eighth	C_parvum	C_parvum_B	4	A	0	1	02_Eighth	1038849	936719	9.36719	875154	93.43	29.01	3.09698	28.98	3.09378	874676	93.38
D_G8	D_A8	A8	Double	Double-One-eighth	C_parvum	C_parvum_A	8	G	0	0	02_Eighth	949419	870334	8.70334	199	0.02	0.02	0.00229797	0.15	0.0172348	959	0.11
D_E8	D_B8	B8	Double	Double-One-eighth	C_parvum	C_parvum_E	8	E	0	0.0001	02_Eighth	718312	673061	6.73061	8983	1.33	0.3	0.0445725	0.32	0.047544	9646	1.43
D_D8	D_C8	C8	Double	Double-One-eighth	C_parvum	C_parvum_D	8	D	0	0.001	02_Eighth	786939	721786	7.21786	48496	6.72	1.61	0.223058	1.25	0.173182	49226	6.82
D_C8	D_D8	D8	Double	Double-One-eighth	C_parvum	C_parvum_C	8	C	0	0.01	02_Eighth	1374741	1263449	12.6345	480390	38.02	15.96	1.26321	13.36	1.05742	480378	38.02
D_B8	D_E8	E8	Double	Double-One-eighth	C_parvum	C_parvum_B	8	B	0	0.1	02_Eighth	4968997	4614398	46.144	3805697	82.47	126.45	2.74034	49.05	1.06298	3801390	82.38
