# Supplementary material for: Whole Genome Targeted Enrichment and Sequencing of Human-Infecting Cryptosporidium spp.
Source: Research Square preprint supplement (doi:10.21203/rs.3.rs-4294842/v1), 2024-05-17
Supplement: Supplementary file 3 [file 1f9771ee01febfe80c9f18e3.xlsx]

## Sheet: Sheet1
Sample	Library	Raw_Reads	Filtered_Reads	Percentage_retained	Number_mapped_each	%_Both_mapped_each	Depth_each	Breadth_each	Fold_Change
C.parvum_MG01	Enriched	1148182	1082756	94.3	1044510	0.9624	20.5222	0.915419	1.34714
C.parvum_MG02	Enriched	1436830	1359274	94.6	1261313	0.9253	25.1723	0.930059	1.34375
C.parvum_B	Enriched	252184	245414	97.3	226248	0.9203	4.94397	0.736832	1.10568
C.meleagridis_1	Enriched	996070	959086	96.3	953824	0.9923	19.99	0.845035	1.22675
C.meleagridis_2	Enriched	798254	714886	97.4	710093	0.9903	15.9207	0.832139	1.17775
C.parvum_MG01	Unenriched	550548	385416	70	225719	0.5848	3.51069	0.817358
C.parvum_MG02	Unenriched	968054	850252	70.4	546965	0.6416	8.91309	0.98618
C.parvum_B	Unenriched	286426	252014	88	52595	0.2084	0.987155	0.42187
C.meleagridis_1	Unenriched	491466	385714	78.5	380314	0.9849	6.61926	0.944448
C.meleagridis_2	Unenriched	309110	255696	82.7	252622	0.9868	4.77502	0.908192
		926304		95.98	839198	0.95812	17.3098	0.851897
		521121		77.92	291643	0.6813	4.96104	0.81561
