# Supplementary material for: Whole Genome Targeted Enrichment and Sequencing of Human-Infecting Cryptosporidium spp.
Source: Research Square preprint supplement (doi:10.21203/rs.3.rs-4294842/v1), 2024-05-17
Supplement: Supplementary file 4 [file 2f513a3c521daa02b931cd2e.xlsx]

## Sheet: Sheet1
Label	Sample_Name	Library	Raw_Paired_Reads	Trim_Paired_Reads	Paired_Mapped_Reads_Cparvum	Per_Paired_Mapped_Reads_Cparvum	Paired_Mapped_Reads_Cmeleagridis	Per_Paired_Mapped_Reads_Cmeleagridis	Paired_Mapped_Reads_10_Genomes	Per_Paired_Mapped_Reads_10_Genomes
Crypto_8	C_parvum_MG01	Enriched	718415	679637	628244	92.4382	528109	77.7046	628260	92.4405
Crypto_10	C_meleagridis01	Enriched	399127	388771	318844	82.0133	384837	98.9881	385021	99.0354
Crypto_26	C_parvum MG02	Unenriched	604137	425126	272402	64.0756	242733	57.0967	272300	64.0516
Crypto_28	C_meleagridis02	Unenriched	391996	326577	322050	98.6138	322050	98.6138	322248	98.6744
