# Supplementary material for: Whole Genome Targeted Enrichment and Sequencing of Human-Infecting Cryptosporidium spp.
Source: Research Square preprint supplement (doi:10.21203/rs.3.rs-4294842/v1), 2024-05-17
Supplement: Supplementary file 5 [file 3d34506997fd89d3cb712b62.xlsx]

## Sheet: clinical_samples_iTruvsiNext_su
Protocol	fastq-label	Sample	Ct_qPCR	RawReadPairs	TrimmedReadPairs	PerReadsRetained	Number_of_hundred_thousand_paired_reads	MappedPairedReadsCparvum	PerMapPairedReadsCparvum	AverageBreadthCparvum	Normalized_Breadth_Cparvum	AverageDepthCparvum	Normalized_Depth_Cparvum	MappedPairedReads10RefGenomes	PerMapPairedReads10RefGenomes	Fold_Change_C_parvum	Fold_Change_Ten_Genomes
iNextEra	UKRC_01	UKP301	24.525	504350	462706	0.91743	4.62706	66413	14.3532	17.2301	3.72376	2.99264	0.64677	72589	15.6879	1554.88	598.337
iNextEra	UKRC_02	UKP302	23.86	3050949	2798140	0.917138	27.9814	208324	7.44509	64.0183	2.28789	9.41151	0.336349	209766	7.49662	953.762	206.275
iNextEra	UKRC_03	UKP303	25.365	2319619	2097302	0.904158	20.973	204870	9.76826	52.7103	2.51324	7.62827	0.363718	216791	10.3367	1182.67	443.708
iNextEra	UKRC_04	UKP304	24.865	4597579	4243662	0.923021	42.4366	167050	3.93646	39.228	0.92439	5.97717	0.140849	181796	4.28394	733.749	78.7777
iNextEra	UKRC_05	UKP305	28.665	3767534	3469387	0.920864	34.6939	586641	16.9091	70.9001	2.04359	19.7624	0.569624	616023	17.756	1256.42	503.46
iNextEra	UKRC_06	UKP306	25.655	5035958	4487985	0.891188	44.8798	533659	11.8908	64.9313	1.44678	15.7703	0.35139	771814	17.1973	1148.29	699.544
iNextEra	UKRC_07	UKP307	21.08	5401223	4998909	0.925514	49.9891	2212510	44.2599	98.4413	1.96925	84.431	1.68899	2214783	44.3053	821.852	391.976
iNextEra	UKRC_08	UKP308	24.195	4793666	4157803	0.867354	41.578	258587	6.21932	40.8958	0.983591	8.44544	0.203123	355531	8.55093	437.531	37.5654
iNextEra	UKRC_09	UKH144	30.36	NA	NA	NA	NA	NA	NA	NA	NA	NA	NA	NA	NA	NA	NA
iNextEra	UKRC_10	UKH145	31.72	1589790	1424170	0.895823	14.2417	31254	2.19454	11.4385	0.803173	1.07909	0.07577	65264	4.5826	1835.23	486.332
iNextEra	UKRC_11	UKP311	28.175	7269016	6761657	0.930203	67.6166	134265	1.98568	30.1802	0.446343	4.38929	0.0649144	165515	2.44785	623.783	119.67
iNextEra	UKRC_12	UKP312	25.645	33731557	30900075	0.916058	309.001	4724472	15.2895	99.9759	0.323546	199.944	0.647067	14195438	45.9398	45.4082	61.4359
iNextEra	UKRC_13	UKP313	23.115	4616460	4173973	0.90415	41.7397	935354	22.4092	79.5232	1.90522	25.346	0.607238	1295415	31.0355	1038.83	631.266
iNextEra	UKRC_14	UKP314	23.76	1536431	1414947	0.920931	14.1495	76262	5.38974	18.9973	1.34261	3.19485	0.225793	92778	6.55699	3363.01	447.956
iNextEra	UKRC_15	UKP315	25.81	6480923	5962285	0.919975	59.6228	404924	6.79142	40.1899	0.674068	8.98094	0.150629	627537	10.5251	844.695	268.817
iNextEra	UKRC_16	UKP316	21.2	4472143	4113870	0.919888	41.1387	599314	14.5681	73.5078	1.78683	22.2172	0.540055	706749	17.1797	923.625	577.406
iNextEra	UKRC_17	UKP317	24.2	978496	888653	0.908183	8.88653	112514	12.6612	33.8325	3.80717	3.49788	0.393616	152555	17.167	1436.81	690.66
iNextEra	UKRC_18	UKP318	28.055	510014	479488	0.940147	4.79488	63446	13.232	33.9037	7.07081	2.10867	0.439775	63957	13.3386	2561.63	475.847
iNextEra	UKRC_19	UKP319	27.69	1986151	1848868	0.93088	18.4887	96166	5.20134	19.5444	1.0571	3.12446	0.168993	106575	5.76434	2274.73	341.137
iNextEra	UKRC_20	UKP320	22.63	6157797	5751202	0.933971	57.512	2422370	42.1194	98.4877	1.71247	83.9924	1.46043	2430988	42.2692	606.67	256.122
iNextEra	UKRC_21	UKP321	26.425	NA	NA	NA	NA	NA	NA	NA	NA	NA	NA	NA	NA	NA	NA
iNextEra	UKRC_22	UKP322	21.94	5367653	4831997	0.900207	48.32	1640646	33.9538	92.454	1.91337	57.032	1.1803	1822343	37.7141	1109.38	722.541
iNextEra	UKRC_23	UKP323	26.755	922332	805142	0.872942	8.05142	135030	16.771	47.3721	5.88369	4.47776	0.556146	160135	19.889	1808.52	444.034
iNextEra	UKRC_24	UKP324	26.885	2436045	2235224	0.917563	22.3522	233564	10.4492	59.8329	2.67682	8.7869	0.393111	243458	10.8919	1290.91	449.276
iNextEra	UKRC_25	UKP325	27.98	6160058	5546684	0.900427	55.4668	557110	10.044	49.4577	0.891662	10.8855	0.196253	1002704	18.0775	576.745	221.423
iNextEra	UKRC_26	UKP326	27.56	7961335	6793213	0.853276	67.9321	815966	12.0115	65.846	0.96929	18.7411	0.27588	1297657	19.1023	558.182	411.588
iNextEra	UKRC_27	UKP327	29.19	4420418	3941492	0.891656	39.4149	139549	3.54051	40.2535	1.02127	4.91454	0.124687	147349	3.73841	855.962	174.583
iNextEra	UKRC_28	UKP328	26.125	NA	NA	NA	NA	NA	NA	NA	NA	NA	NA	NA	NA	NA	NA
iNextEra	UKRC_29	UKP329	26.07	3369135	3095372	0.918744	30.9537	1390244	44.9136	97.8847	3.16229	47.6454	1.53925	1425464	46.0515	998.989	790.079
iNextEra	UKRC_30	UKH146	26.3	2662536	2473500	0.929002	24.735	57662	2.33119	20.6987	0.83682	2.13411	0.0862789	83734	3.38524	1340.93	174.214
iNextEra	UKRC_31	UKP331	23.085	2692838	2430839	0.902705	24.3084	518602	21.3343	85.6556	3.5237	19.7643	0.813064	521905	21.4702	1147.16	530.762
iNextEra	UKRC_32	UKP332	31.075	5461726	4939397	0.904366	49.394	1294776	26.2132	90.3764	1.8297	49.2788	0.997669	1314885	26.6204	518.374	121.326
iNextEra	UKRC_33	UKP333	26.17	2735706	2509503	0.917315	25.095	814068	32.4394	90.8541	3.6204	29.9067	1.19174	855218	34.0792	1306.06	975.533
iNextEra	UKRC_34	UKP334	24.155	9695921	8833691	0.911073	88.3369	973984	11.0258	79.4129	0.898978	24.4111	0.276341	1405398	15.9095	598.455	414.359
iNextEra	UKRC_35	UKP335	24.265	1513727	1378684	0.910788	13.7868	46651	3.38373	16.5734	1.20211	1.77373	0.128654	50471	3.66081	1437.62	129.163
iNextEra	UKRC_36	UKP336	23.31	5044310	4661415	0.924094	46.6142	1053704	22.6048	81.2355	1.74272	40.07	0.85961	1046263	22.4452	1900.88	1018.65
iNextEra	UKRC_37	UKP337	30.085	1350393	1230812	0.911447	12.3081	386854	31.4308	43.3077	3.51862	13.2646	1.07771	393492	31.9701	1972.65	1306.07
iNextEra	UKRC_38	UKP338	24.38	NA	NA	NA	NA	NA	NA	NA	NA	NA	NA	NA	NA	NA	NA
iNextEra	UKRC_39	UKP339	25.07	2225359	2020937	0.90814	20.2094	319237	15.7965	63.8576	3.1598	11.1976	0.554077	383404	18.9716	1331.65	560.201
iNextEra	UKRC_40	UKP340	24.45	6487880	6038428	0.930724	60.3843	266236	4.40903	44.1025	0.730365	10.6125	0.17575	306447	5.07495	718.61	214.108
iNextEra	UKRC_41	UKP341	23.32	6087313	5680804	0.93322	56.808	875448	15.4106	83.2305	1.46512	33.0192	0.581241	881153	15.5111	1010.16	366.436
iNextEra	UKRC_42	UKP342	24.95	3856351	3572409	0.92637	35.7241	162964	4.56174	35.0597	0.981402	6.67918	0.186966	177625	4.97214	879.699	493.021
iNextEra	UKRC_43	UKP343	22.815	25345554	23163166	0.913895	231.632	15957290	68.8908	99.9991	0.431716	546.968	2.36137	16344542	70.5626	159.809	155.954
iNextEra	UKRC_44	UKH147	26.6	1198923	1097661	0.915539	10.9766	122083	11.1221	17.8583	1.62694	4.97628	0.453353	132663	12.086	2853.89	727.122
iNextEra	UKRC_45	UKP345	26.725	6236229	5489849	0.880315	54.8985	83766	1.52583	13.294	0.242156	2.0733	0.0377661	158395	2.88523	91.9546	6.05504
iNextEra	UKRC_46	UKP346	27.155	732423	689189	0.940971	6.89189	13274	1.92603	4.47478	0.649282	0.461233	0.066924	16800	2.43765	2029.13	210.636
iNextEra	UKRC_47	UKP347	24.03	10885789	9135761	0.839237	91.3576	3097736	33.9078	86.0002	0.941357	84.674	0.926841	3890621	42.5867	117.567	42.1835
iNextEra	UKRC_48	UKP348	24.775	2777222	2601161	0.936605	26.0116	331050	12.727	47.5116	1.82656	12.7862	0.491556	358074	13.7659	1635.89	846.352
iNextEra	UKRC_49	UKP349	25.835	3268157	3068358	0.938865	30.6836	201793	6.57658	39.9757	1.30284	7.49605	0.244302	249040	8.11639	1390.16	520.375
iNextEra	UKRC_50	UKP350	24.215	2178964	1778071	0.816017	17.7807	26991	1.51799	6.31862	0.355364	0.927664	0.0521725	54860	3.08537	86.4587	8.85539
iNextEra	UKRC_51	UKP351	28.555	4399274	3893287	0.884984	38.9329	416521	10.6984	53.2617	1.36804	12.9536	0.332717	642259	16.4966	968.584	236.898
iNextEra	UKRC_52	UKP352	26.23	3440914	3258820	0.94708	32.5882	31996	0.981828	7.39458	0.22691	1.29137	0.039627	41198	1.2642	938.038	149.113
iNextEra	UKRC_53	UKP353	28.96	NA	NA	NA	NA	NA	NA	NA	NA	NA	NA	NA	NA	NA	NA
iNextEra	UKRC_54	UKP354	25.32	NA	NA	NA	NA	NA	NA	NA	NA	NA	NA	NA	NA	NA	NA
iNextEra	UKRC_55	UKH148	27.715	872101	777747	0.891808	7.77747	232540	29.8992	61.6603	7.92807	8.13578	1.04607	257929	33.1636	1532.04	811.94
iNextEra	UKRC_56	UKP356	26.05	1752865	1595169	0.910035	15.9517	40759	2.55515	15.9719	1.00127	1.63929	0.102766	52069	3.26417	1320.93	136.821
iNextEra	UKRC_57	UKP357	24.31	3457090	3279689	0.948685	32.7969	692362	21.1106	74.2176	2.26295	24.8327	0.757167	689668	21.0285	1733.97	704.089
iNextEra	UKRC_58	UKP358	23.6	3441619	3235137	0.940004	32.3514	351585	10.8677	62.0121	1.91683	14.282	0.441466	355429	10.9865	1230.3	455.311
iNextEra	UKRC_59	UKP359	22.055	1205243	1134812	0.941563	11.3481	383342	33.7802	72.7192	6.40804	15.2667	1.34531	385319	33.9544	1779.53	680.628
iNextEra	UKRC_60	UKP360	25.275	3711160	3495535	0.941898	34.9554	20202	0.577937	4.13913	0.118412	0.73091	0.0209098	45386	1.2984	941.021	197.317
iNextEra	UKRC_61	UKP361	25.1	5891155	4992599	0.847474	49.926	1575803	31.5628	84.6938	1.69639	51.1542	1.0246	1925817	38.5734	365.248	175.67
iNextEra	UKRC_62	UKP362	23.735	1708273	1559605	0.912972	15.596	386070	24.7543	73.4229	4.70779	18.9467	1.21484	380384	24.3898	1394.49	232.093
iNextEra	UKRC_63	UKP363	24.17	1401388	1313184	0.93706	13.1318	596904	45.4547	42.1202	3.20749	21.3956	1.62929	21167	1.61188	2477.15	60.1873
iNextEra	UKRC_64	UKP364	25.155	3479377	3239034	0.930924	32.3903	338579	10.4531	57.9987	1.79062	11.721	0.361868	385687	11.9075	1273.14	404.78
iNextEra	UKRC_65	UKH149	28.58	6002716	5220741	0.86973	52.2074	424875	8.13821	26.3526	0.504767	5.25173	0.100594	1008194	19.3113	689.516	441.726
iNextEra	UKRC_66	UKP366	23.79	17030549	15367331	0.902339	153.673	5077945	33.0438	99.6472	0.648436	196.192	1.27668	5630619	36.6402	500.402	263.726
iNextEra	UKRC_67	UKP367	23.815	5165437	4888109	0.946311	48.8811	404283	8.27074	59.3709	1.2146	16.5052	0.337661	423353	8.66087	871.479	324.043
iNextEra	UKRC_68	UKP368	24.75	16153819	12220152	0.756487	122.202	1506742	12.33	76.7053	0.627695	29.8146	0.243979	2738625	22.4107	134.426	86.7973
iNextEra	UKRC_69	UKP369	23.535	NA	NA	NA	NA	NA	NA	NA	NA	NA	NA	NA	NA	NA	NA
iNextEra	UKRC_70	UKP370	26.825	9597919	9014938	0.93926	90.1494	4219520	46.8059	99.829	1.10737	158.433	1.75745	4301337	47.7134	415.647	348.57
iNextEra	UKRC_71	UKP371	26.645	2366544	2147351	0.907378	21.4735	149894	6.98041	34.2784	1.59631	6.08694	0.283463	172849	8.04941	1398.85	299.545
iNextEra	UKRC_72	UKP372	25.13	23062748	19717836	0.854965	197.178	2749602	13.9447	74.4852	0.377755	36.5487	0.185358	5459003	27.6856	187.431	209.988
iNextEra	UKRC_73	UKH150	24.425	577392	539862	0.935001	5.39862	70953	13.1428	23.1489	4.28792	2.63287	0.487693	86020	15.9337	2962.62	903.935
iNextEra	UKRC_74	UKP374	23.38	14662455	13121941	0.894935	131.219	3862326	29.4341	98.3161	0.74925	141.735	1.08014	4484937	34.1789	272.551	132.125
iNextEra	UKRC_75	UKP375	27.765	2953789	2780560	0.941354	27.8056	233431	8.39511	38.7876	1.39496	8.22738	0.295889	249595	8.97643	1370.81	868.827
iNextEra	UKRC_76	UKP376	22.655	3760361	3422262	0.910089	34.2226	282550	8.25624	57.0438	1.66684	11.7428	0.34313	310241	9.06538	845.084	98.3662
iNextEra	UKRC_77	UKP377	22.055	4491240	4020584	0.895206	40.2058	146944	3.65479	20.1799	0.501913	3.96555	0.0986312	225655	5.61249	679.745	246.065
iNextEra	UKRC_78	UKP378	25.115	NA	NA	NA	NA	NA	NA	NA	NA	NA	NA	NA	NA	NA	NA
iNextEra	UKRC_79	UKP379	23.68	1068227	979672	0.917101	9.79672	19654	2.00618	6.20595	0.633472	0.753075	0.0768701	35398	3.61325	1208.89	67.8594
iNextEra	UKRC_80	UKP380	20.13	5642258	5290419	0.937642	52.9042	1458799	27.5744	88.1848	1.66688	57.6007	1.08877	1469507	27.7768	1231.85	470.481
iNextEra	UKRC_81	UKP381	26.03	3077531	2868640	0.932124	28.6864	41359	1.44176	4.67194	0.162863	0.948011	0.0330474	93647	3.26451	783.753	62.4074
iNextEra	UKRC_82	UKP382	25.565	6427173	5985813	0.931329	59.8581	750386	12.5361	80.795	1.34977	26.192	0.437568	769124	12.8491	1042.94	496.982
iNextEra	UKRC_83	UKP383	18.905	5499251	5102023	0.927767	51.0202	1043707	20.4567	92.0826	1.80483	37.2699	0.730493	1070455	20.981	741.815	160.591
iNextEra	UKRC_84	UKP384	20.11	3295631	3058607	0.928079	30.5861	653963	21.3811	89.1032	2.9132	29.0581	0.950043	714653	23.3653	1261.89	987.854
iNextEra	UKRC_85	UKP385	22.09	3558515	3226400	0.90667	32.264	548291	16.9939	83.5927	2.5909	21.9569	0.680538	555424	17.215	838.361	195.561
iNextEra	UKRC_86	UKP386	23.45	1069184	870233	0.813923	8.70233	16514	1.89765	8.60831	0.989196	0.685056	0.078721	24193	2.78006	1132.25	180.656
iNextEra	UKRC_87	UKP387	23.92	3612610	3324136	0.920148	33.2414	881705	26.5243	69.9186	2.10336	36.8234	1.10776	882109	26.5365	1435.59	265.286
iNextEra	UKRC_88	UKP388	26.475	5554251	4883402	0.879219	48.834	1459697	29.891	80.8883	1.65639	41.6788	0.853479	1890172	38.706	387.003	156.844
iNextEra	UKRC_89	UKP389	29.71	3338029	3094617	0.927079	30.9462	222949	7.20441	35.6547	1.15215	7.86885	0.254276	270877	8.75317	1363.89	565.752
iNextEra	UKRC_90	UKP390	29.07	835014	787639	0.943264	7.87639	29291	3.71884	9.55858	1.21357	1.05448	0.133879	44811	5.68928	3689.59	905.258
iNextEra	UKRC_91	UKP391	22.035	31610582	23719341	0.750361	237.193	2414774	10.1806	83.518	0.352109	38.3338	0.161614	4768257	20.1028	46.2268	36.6246
iNextEra	UKRC_92	UKP392	23.93	3064275	2538581	0.828444	25.3858	44868	1.76744	5.94554	0.234207	1.26258	0.0497358	105065	4.13873	111.412	6.52735
iNextEra	UKRC_93	UKP393	22.505	2407520	2248422	0.933916	22.4842	1001244	44.531	84.3024	3.7494	40.0164	1.77975	989984	44.0302	1248.92	502.949
iNextEra	UKRC_94	UKP394	25.84	3037108	2852841	0.939328	28.5284	44949	1.57559	12.3962	0.434521	1.61277	0.056532	57971	2.03204	620.397	45.1767
iNextEra	UKRC_95	UKP395A	25.16	1311763	1173235	0.894396	11.7324	100295	8.54859	38.1681	3.25324	3.6605	0.312001	100752	8.58754	1645.07	395.889
iNextEra	UKRC_96	UKP395B	24.88	NA	NA	NA	NA	NA	NA	NA	NA	NA	NA	NA	NA	NA	NA
iNextEra	UKRC_97	UKH151	37.81	4229825	3959498	0.93609	39.595	5150	0.130067	1.54497	0.0390193	0.176817	0.00446564	11924	0.301149	323.761	23.4255
iNextEra	UKRC_98	UKP398	25.575	10999917	10303509	0.93669	103.035	3916192	38.0083	99.8901	0.969476	162.549	1.57761	3897561	37.8275	486.168	274.254
iNextEra	UKRC_99	UKP399	27.59	3356079	3111726	0.927191	31.1173	580264	18.6477	88.6045	2.84744	26.9497	0.86607	575249	18.4865	1277.79	807.852
iNextEra	UKRC_100	UKP400	28.995	6704297	5963061	0.889439	59.6306	889017	14.9087	76.3944	1.28113	19.5343	0.327588	1335437	22.3952	731.586	405.902
NEB-iTru	UKRC_01	UKP301	24.525	1572833	1438615	91.4665	14.3862	324591	22.5627	48.8	3.39215e-05	11.7716	0.521726	344557	23.9506	NA	NA
NEB-iTru	UKRC_02	UKP302	23.86	1367719	1219286	89.1474	12.1929	364885	29.9261	48.2823	3.95989e-05	12.1462	0.405872	365674	29.9908	NA	NA
NEB-iTru	UKRC_03	UKP303	25.365	1233010	1087934	88.234	10.8793	201974	18.5649	31.6598	2.91009e-05	6.69791	0.360783	209715	19.2764	NA	NA
NEB-iTru	UKRC_04	UKP304	24.865	1204428	1052921	87.4208	10.5292	154492	14.6727	29.5053	2.80223e-05	5.00396	0.341039	164402	15.6139	NA	NA
NEB-iTru	UKRC_05	UKP305	28.665	496556	448593	90.3409	4.48593	220343	49.1187	26.2063	5.84188e-05	7.01715	0.142861	232921	51.9226	NA	NA
NEB-iTru	UKRC_06	UKP306	25.655	840653	738791	87.883	7.38791	238422	32.2719	27.284	3.69306e-05	6.5187	0.201993	332560	45.0141	NA	NA
NEB-iTru	UKRC_07	UKP307	21.08	3229135	2972730	92.0596	29.7273	2382992	80.1617	90.2385	3.03554e-05	79.3757	0.990195	2379064	80.0296	NA	NA
NEB-iTru	UKRC_08	UKP308	24.195	1111451	964509	86.7793	9.64509	256923	26.6377	32.8443	3.40528e-05	8.2634	0.310214	296730	30.7649	NA	NA
NEB-iTru	UKRC_09	UKH144	30.36	333012	284567	85.4525	2.84567	7353	2.58393	1.514	5.32036e-06	0.246833	0.0955262	11076	3.89223	NA	NA
NEB-iTru	UKRC_10	UKH145	31.72	413223	323161	78.205	3.23161	31456	9.73385	3.71166	1.14855e-05	0.91648	0.0941539	67669	20.9397	7.20305	15.4954
NEB-iTru	UKRC_11	UKP311	28.175	1459499	1229575	84.2464	12.2957	201308	16.3722	11.8308	9.62189e-06	6.22967	0.380504	256731	20.8797	5071.74	648.608
NEB-iTru	UKRC_12	UKP312	25.645	18716331	16420357	87.7328	164.204	11842906	72.1233	94.2346	5.73889e-06	403.94	5.60069	11920653	72.5968	120.101	93.4628
NEB-iTru	UKRC_13	UKP313	23.115	1199429	957100	79.7963	9.571	221283	23.1202	9.24643	9.66089e-06	4.13722	0.178944	350769	36.6491	NA	NA
NEB-iTru	UKRC_14	UKP314	23.76	1370506	1139382	83.1359	11.3938	272587	23.9241	16.6009	1.45701e-05	7.90369	0.330365	358391	31.4549	3873.38	949.563
NEB-iTru	UKRC_15	UKP315	25.81	6049518	4770586	78.8589	47.7059	1325527	27.7854	28.832	6.04369e-06	24.9829	0.899137	1971801	41.3325	1067.77	723.43
NEB-iTru	UKRC_16	UKP316	21.2	955349	744462	77.9257	7.44462	278382	37.3937	10.8702	1.46014e-05	7.39718	0.197819	363106	48.7743	NA	NA
NEB-iTru	UKRC_17	UKP317	24.2	2589292	1996783	77.1169	19.9678	194544	9.74287	12.0062	6.01277e-06	4.37626	0.449176	328417	16.4473	1177.14	565.386
NEB-iTru	UKRC_18	UKP318	28.055	741781	632588	85.2796	6.32588	221993	35.0928	13.8696	2.19252e-05	7.30106	0.20805	226833	35.8579	5060.24	1147.19
NEB-iTru	UKRC_19	UKP319	27.69	965347	780461	80.8477	7.80461	118149	15.1384	9.10389	1.16648e-05	3.28515	0.217008	169214	21.6813	4651.83	1139.48
NEB-iTru	UKRC_20	UKP320	22.63	2177652	1918697	88.1085	19.187	995210	51.8691	77.1713	4.02207e-05	32.9046	0.634378	997219	51.9738	NA	NA
NEB-iTru	UKRC_21	UKP321	26.425	2313926	1881299	81.3033	18.813	646005	34.3382	28.3263	1.50568e-05	17.1385	0.499108	825356	43.8716	2341.46	1132.34
NEB-iTru	UKRC_22	UKP322	21.94	9081098	7447047	82.006	74.4705	3710478	49.8248	60.4916	8.1229e-06	105.709	2.12161	4315650	57.9512	886.823	641.454
NEB-iTru	UKRC_23	UKP323	26.755	5238207	4069383	77.6866	40.6938	735885	18.0835	21.9109	5.38434e-06	12.7444	0.704754	1162924	28.5774	1196.61	314.151
NEB-iTru	UKRC_24	UKP324	26.885	112095	94981	84.7326	0.94981	36224	38.1382	3.39207	3.57132e-05	1.25361	0.0328703	39153	41.2219	NA	NA
NEB-iTru	UKRC_25	UKP325	27.98	1251165	928551	74.2149	9.28551	196560	21.1685	9.40005	1.01234e-05	2.80842	0.13267	336637	36.254	NA	NA
NEB-iTru	UKRC_26	UKP326	27.56	1369813	914421	66.7552	9.14421	198425	21.6995	8.42271	9.21098e-06	3.02488	0.139398	348504	38.112	NA	NA
NEB-iTru	UKRC_27	UKP327	29.19	1318541	1112967	84.409	11.1297	354967	31.8938	20.3416	1.82769e-05	12.0485	0.377769	376201	33.8016	3622.72	785.706
NEB-iTru	UKRC_28	UKP328	26.125	523427	403513	77.0906	4.03513	77307	19.1585	5.61929	1.39259e-05	2.09746	0.109479	117064	29.0112	24.906	12.5715
NEB-iTru	UKRC_29	UKP329	26.07	688151	610461	88.7103	6.10461	402043	65.8589	19.2319	3.15039e-05	13.3485	0.202683	418367	68.533	NA	NA
NEB-iTru	UKRC_30	UKH146	26.3	857637	733641	85.5421	7.33641	23525	3.20661	6.79053	9.25593e-06	0.779727	0.243163	30307	4.13104	NA	NA
NEB-iTru	UKRC_31	UKP331	23.085	3629010	3170596	87.3681	31.706	1970071	62.1357	50.859	1.60408e-05	66.8103	1.07523	1983800	62.5687	1401.85	898.385
NEB-iTru	UKRC_32	UKP332	31.075	2220349	1837893	82.775	18.3789	885197	48.1637	25.5409	1.38969e-05	30.2961	0.629025	900217	48.9809	618.323	229.295
NEB-iTru	UKRC_33	UKP333	26.17	7059942	6157413	87.2162	61.5741	4119625	66.9051	77.0058	1.25062e-05	135.438	2.02433	4249241	69.0102	1294.14	995.282
NEB-iTru	UKRC_34	UKP334	24.155	176539	137717	78.0094	1.37717	39880	28.9579	2.7701	2.01145e-05	1.10766	0.0382508	58314	42.3434	NA	NA
NEB-iTru	UKRC_35	UKP335	24.265	692581	588450	84.9648	5.8845	136286	23.1602	15.3017	2.60034e-05	4.57769	0.197654	148486	25.2334	3039.56	593.744
NEB-iTru	UKRC_36	UKP336	23.31	300006	258018	86.0043	2.58018	106376	41.2281	7.6537	2.96634e-05	3.74153	0.0907519	108267	41.961	NA	NA
NEB-iTru	UKRC_37	UKP337	30.085	1223719	1110862	90.7775	11.1086	193227	17.3943	33.7516	3.03833e-05	6.50716	0.374096	199792	17.9853	NA	NA
NEB-iTru	UKRC_38	UKP338	24.38	1150239	1053966	91.6302	10.5397	795652	75.4912	66.0078	6.2628e-05	26.807	0.355101	791075	75.057	NA	NA
NEB-iTru	UKRC_39	UKP339	25.07	29364	24723	84.1949	0.24723	9242	37.3822	1.67076	6.75791e-05	0.314631	0.0084166	10872	43.9752	NA	NA
NEB-iTru	UKRC_40	UKP340	24.45	2026746	1746087	86.1522	17.4609	776536	44.4729	30.3499	1.73817e-05	25.4102	0.571364	845166	48.4034	2302.17	1204.86
NEB-iTru	UKRC_41	UKP341	23.32	84754	74581	87.997	0.74581	41917	56.2033	3.39767	4.55567e-05	1.45847	0.02595	41874	56.1457	NA	NA
NEB-iTru	UKRC_42	UKP342	24.95	1284844	1089439	84.7915	10.8944	470432	43.1811	29.0788	2.66916e-05	15.3904	0.356415	504161	46.2771	2317.74	1247.46
NEB-iTru	UKRC_43	UKP343	22.815	26484687	23078867	87.1404	230.789	18401815	79.7345	96.362	4.17533e-06	559.41	7.0159	19159559	83.0178	196.88	190.715
NEB-iTru	UKRC_44	UKH147	26.6	846892	736211	86.9309	7.36211	100542	13.6567	6.50923	8.84153e-06	3.54237	0.259387	107138	14.5526	3014.18	527.026
NEB-iTru	UKRC_45	UKP345	26.725	9371292	6827061	72.8508	68.2706	370509	5.42706	21.1296	3.09498e-06	8.84388	1.62959	545313	7.98752	102.142	19.9491
NEB-iTru	UKRC_46	UKP346	27.155	3603162	2577064	71.5223	25.7706	428228	16.6169	18.7112	7.26065e-06	7.2569	0.436718	722385	28.0313	1769.59	1126.73
NEB-iTru	UKRC_47	UKP347	24.03	5570873	4918086	88.2821	49.1809	2845004	57.8478	94.0141	1.9116e-05	82.3306	1.42323	3192272	64.9088	NA	NA
NEB-iTru	UKRC_48	UKP348	24.775	1675111	1474559	88.0275	14.7456	767229	52.0311	31.2322	2.11807e-05	27.2658	0.524029	779076	52.8345	2927.09	1963.8
NEB-iTru	UKRC_49	UKP349	25.835	662886	603222	90.9994	6.03222	283821	47.0508	32.765	5.43166e-05	9.40383	0.199865	311663	51.6664	NA	NA
NEB-iTru	UKRC_50	UKP350	24.215	15914811	11863454	74.5435	118.635	372190	3.13728	18.6508	1.57212e-06	8.31846	2.65148	606952	5.11615	78.0173	21.7492
NEB-iTru	UKRC_51	UKP351	28.555	2239834	1787980	79.8265	17.8798	511700	28.6189	18.0078	1.00716e-05	11.9997	0.419291	698283	39.0543	1313.06	685.587
NEB-iTru	UKRC_52	UKP352	26.23	1470483	1196649	81.378	11.9665	232097	19.3956	14.8312	1.23939e-05	5.96491	0.30754	328536	27.4547	2782.67	1617.16
NEB-iTru	UKRC_53	UKP353	28.96	2579529	2267580	87.9067	22.6758	1290823	56.9251	46.9362	2.06988e-05	47.522	0.834816	1291583	56.9587	NA	NA
NEB-iTru	UKRC_54	UKP354	25.32	7780700	5725619	73.5875	57.2562	710166	12.4033	12.5204	2.18673e-06	3.95928	0.319212	1402312	24.4919	NA	NA
NEB-iTru	UKRC_55	UKH148	27.715	2022502	1807424	89.3657	18.0742	605246	33.4867	55.6864	3.08098e-05	18.8253	0.562172	738831	40.8776	NA	NA
NEB-iTru	UKRC_56	UKP356	26.05	520513	428844	82.3887	4.28844	57083	13.3109	4.85213	1.13144e-05	1.80863	0.135876	73298	17.092	NA	NA
NEB-iTru	UKRC_57	UKP357	24.31	1312770	1207837	92.0067	12.0784	837755	69.3599	66.1144	5.47378e-05	27.521	0.396785	832881	68.9564	NA	NA
NEB-iTru	UKRC_58	UKP358	23.6	775646	661495	85.2831	6.61495	221628	33.5041	13.8348	2.09145e-05	7.82865	0.233662	235919	35.6645	NA	NA
NEB-iTru	UKRC_59	UKP359	22.055	1056707	927058	87.7308	9.27058	514964	55.5482	25.4508	2.74533e-05	18.3309	0.33	524118	56.5356	1691.19	1166.29
NEB-iTru	UKRC_60	UKP360	25.275	1748592	1461981	83.609	14.6198	146053	9.99008	11.0488	7.55745e-06	4.45283	0.445726	240752	16.4675	4705.71	1414.85
NEB-iTru	UKRC_61	UKP361	25.1	2702353	2404295	88.9704	24.043	1239986	51.5738	77.0672	3.2054e-05	37.0757	0.718887	1468536	61.0797	NA	NA
NEB-iTru	UKRC_62	UKP362	23.735	2818031	2438450	86.5303	24.3845	1380093	56.5971	47.393	1.94357e-05	49.6584	0.877401	1378725	56.541	839.397	559.741
NEB-iTru	UKRC_63	UKP363	24.17	748215	687680	91.9094	6.8768	423537	61.5893	46.5765	6.77299e-05	14.245	0.231291	434450	63.1762	NA	NA
NEB-iTru	UKRC_64	UKP364	25.155	1319878	1104172	83.6571	11.0417	341856	30.9604	16.6928	1.51179e-05	10.2466	0.330958	411101	37.2316	NA	NA
NEB-iTru	UKRC_65	UKH149	28.58	1293527	1125769	87.031	11.2577	127159	11.2953	17.2529	1.53254e-05	2.63532	0.233311	246636	21.9082	NA	NA
NEB-iTru	UKRC_66	UKP366	23.79	2980216	2711123	90.9707	27.1112	1888862	69.6708	94.7212	3.4938e-05	63.4222	0.910311	1957070	72.1867	NA	NA
NEB-iTru	UKRC_67	UKP367	23.815	2562222	2185294	85.289	21.8529	1326700	60.7104	44.3673	2.03027e-05	45.2638	0.745569	1367961	62.5985	1400.46	1162.24
NEB-iTru	UKRC_68	UKP368	24.75	2439042	1621872	66.4963	16.2187	288721	17.8017	7.71788	4.75862e-06	2.28179	0.128178	575670	35.4942	NA	NA
NEB-iTru	UKRC_69	UKP369	23.535	8063879	6122800	75.9287	61.228	1232856	20.1355	26.899	4.39326e-06	17.0258	0.845564	2142142	34.9863	1790.75	1280.46
NEB-iTru	UKRC_70	UKP370	26.825	324820	277216	85.3445	2.77216	180359	65.0608	11.9082	4.29565e-05	6.46994	0.0994445	191482	69.0732	NA	NA
NEB-iTru	UKRC_71	UKP371	26.645	245515	201541	82.0891	2.01541	46711	23.1769	5.74921	2.85263e-05	1.6477	0.0710924	57127	28.3451	NA	NA
NEB-iTru	UKRC_72	UKP372	25.13	3118852	2832062	90.8046	28.3206	2075858	73.2985	95.7153	3.3797e-05	70.1515	0.957067	2106112	74.3667	NA	NA
NEB-iTru	UKRC_73	UKH150	24.425	2211122	1795612	81.2082	17.9561	644215	35.8772	32.9464	1.83483e-05	20.7692	0.578897	779268	43.3985	1846	1318.51
NEB-iTru	UKRC_74	UKP374	23.38	2069887	1652202	79.8209	16.522	673362	40.7554	69.7585	4.22216e-05	17.6515	0.433108	884725	53.5482	NA	NA
NEB-iTru	UKRC_75	UKP375	27.765	682465	570802	83.6383	5.70802	206768	36.2241	15.5347	2.72156e-05	7.11866	0.196517	238004	41.6964	3469.75	2214.24
NEB-iTru	UKRC_76	UKP376	22.655	1882529	1472696	78.2297	14.727	399299	27.1135	18.5364	1.25867e-05	11.6167	0.428447	506727	34.4081	947.614	309.649
NEB-iTru	UKRC_77	UKP377	22.055	2806053	2144179	76.4126	21.4418	537532	25.0694	18.4186	8.59006e-06	7.76548	0.30976	884360	41.2447	873.594	776.645
NEB-iTru	UKRC_78	UKP378	25.115	2268782	1747880	77.0405	17.4788	240493	13.7591	7.72034	4.41698e-06	2.38279	0.173179	478305	27.3649	2101.32	1081.6
NEB-iTru	UKRC_79	UKP379	23.68	969515	750980	77.4593	7.5098	117219	15.6088	7.34541	9.7811e-06	2.85173	0.1827	186173	24.7907	1598.88	684.528
NEB-iTru	UKRC_80	UKP380	20.13	589082	518168	87.9619	5.18168	338038	65.2371	18.7943	3.62707e-05	12.4675	0.191111	339476	65.5147	NA	NA
NEB-iTru	UKRC_81	UKP381	26.03	5931233	4409574	74.345	44.0957	613764	13.9189	16.4917	3.73997e-06	5.70509	0.409881	1209993	27.4401	1160.54	604.391
NEB-iTru	UKRC_82	UKP382	25.565	875170	769372	87.9111	7.69372	315512	41.009	16.5524	2.15141e-05	10.5399	0.257013	331264	43.0564	3308.58	1289.95
NEB-iTru	UKRC_83	UKP383	18.905	2990971	2506569	83.8045	25.0657	1237990	49.3898	45.7003	1.82322e-05	41.3712	0.837647	1327644	52.9666	758.505	375.056
NEB-iTru	UKRC_84	UKP384	20.11	843556	760999	90.2132	7.60999	359270	47.2103	58.1703	7.64395e-05	12.3963	0.262576	398712	52.3932	NA	NA
NEB-iTru	UKRC_85	UKP385	22.09	4236060	3716057	87.7244	37.1606	2373913	63.8826	60.488	1.62775e-05	81.2095	1.27123	2398189	64.5359	1076.91	594.582
NEB-iTru	UKRC_86	UKP386	23.45	1012035	849096	83.8999	8.49096	155951	18.3667	12.8312	1.51116e-05	5.17616	0.281823	215680	25.4011	5097.45	1270.16
NEB-iTru	UKRC_87	UKP387	23.92	3439679	3148287	91.5285	31.4829	1919966	60.9845	87.7635	2.78766e-05	69.1492	1.13388	1918165	60.9273	NA	NA
NEB-iTru	UKRC_88	UKP388	26.475	2052065	1760063	85.7703	17.6006	741193	42.1117	73.3134	4.16539e-05	20.9084	0.496497	937762	53.28	NA	NA
NEB-iTru	UKRC_89	UKP389	29.71	677699	584221	86.2066	5.84221	186831	31.9795	11.3907	1.94972e-05	6.21918	0.194474	226273	38.7307	3491.59	1437.11
NEB-iTru	UKRC_90	UKP390	29.07	661445	545267	82.4357	5.45267	107858	19.7808	10.6477	1.95275e-05	3.28909	0.166277	150020	27.5131	3246.82	1800.65
NEB-iTru	UKRC_91	UKP391	22.035	3446694	2716524	78.8154	27.1652	792868	29.1869	64.7527	2.38366e-05	15.9271	0.545694	1258498	46.3275	NA	NA
NEB-iTru	UKRC_92	UKP392	23.93	4830703	3543282	73.3492	35.4328	171716	4.84624	15.1662	4.28026e-06	4.38245	0.904299	276458	7.80231	1280.09	52.8437
NEB-iTru	UKRC_93	UKP393	22.505	1307947	1190885	91.0499	11.9088	863231	72.4865	81.6441	6.85575e-05	29.7471	0.410381	859064	72.1366	NA	NA
NEB-iTru	UKRC_94	UKP394	25.84	1656710	1352687	81.649	13.5269	268707	19.8647	17.5718	1.29903e-05	8.65235	0.435564	311655	23.0397	2487.22	593.786
NEB-iTru	UKRC_95	UKP395A	25.16	1784152	1540639	86.3513	15.4064	536321	34.8116	22.8609	1.48386e-05	18.7353	0.538193	536767	34.8405	4710.14	897.603
NEB-iTru	UKRC_96	UKP395B	24.88	709519	604727	85.2306	6.04727	29621	4.89824	4.94291	8.17378e-06	0.835012	0.170472	84551	13.9817	4235.09	577.065
NEB-iTru	UKRC_97	UKH151	37.81	317391	270597	85.2567	2.70597	5072	1.87437	2.00172	7.39741e-06	0.18766	0.100119	7380	2.7273	2533.04	113.33
NEB-iTru	UKRC_98	UKP398	25.575	2763502	2433411	88.0553	24.3341	1859182	76.4023	50.22	2.06377e-05	65.7635	0.860753	1862957	76.5574	618.813	411.557
NEB-iTru	UKRC_99	UKP399	27.59	1059424	933403	88.1048	9.33403	548781	58.7936	21.6943	2.32422e-05	18.9999	0.323164	549041	58.8214	2435.69	1259.06
NEB-iTru	UKRC_100	UKP400	28.995	1331962	1079788	81.0675	10.7979	146536	13.5708	35.2541	3.26491e-05	4.67631	0.344586	445423	41.251	1106.3	1140.82
iTru		100	average	2.6032e+06	2.15198e+06	83.8731	21.5198	914219	35.6177	31.3036	2.24522e-05	28.1043	0.595831	1.02889e+06	41.228	2095.68	827.873
			sum	260319769	215198339	8387.31	2151.98	91421940	3561.77	3130.36	0.00224522	2810.43	59.5831	102889347	4122.8	111071	43877.3
			min	29364	24723	66.4963	0.24723	5072	1.87437	1.514	1.57212e-06	0.18766	0.0084166	7380	2.7273	7.20305	12.5715
			max	26484687	23078867	92.0596	230.789	18401815	80.1617	96.362	7.64395e-05	559.41	7.0159	19159559	83.0178	5097.45	2214.24
iNextEra		91	average	5.29844e+06	4.72589e+06	0.907913	47.2589	941467	15.8512	54.3804	1.79048	32.1178	0.563431	1200014	17.9021	1112.76	382.79
			sum	482158421	430055941			85673469						109201274
			min	504350	462706	0.750361	4.62706	5150	0.130067	1.54497	0.0390193	0.176817	0.00446564	11924	0.301149	45.4082	6.05504
			max	33731557	30900075	0.948685	309.001	15957290	68.8908	99.9991	7.92807	546.968	2.36137	16344542	70.5626	3689.59	1306.07
