# Supplementary material for: Whole Genome Targeted Enrichment and Sequencing of Human-Infecting Cryptosporidium spp.
Source: Research Square preprint supplement (doi:10.21203/rs.3.rs-4294842/v1), 2024-05-17
Supplement: Supplementary file 6 [file 85fa269fce19bc9d8a7070dc.xlsx]

## Sheet: clinical_samples_iNextsummary_s
Library	fastq_label	Sample	Ct_qPCR	RawReadPairs	TrimmedReadPairs	PerReadsRetained	Number_of_hundred_thousand_paired_reads	MappedPairedReadsCparvum	PerMapPairedReadsCparvum	AverageBreadthCparvum	Normalized_Breadth_Cparvum	AverageDepthCparvum	Normalized_Depth_Cparvum	MappedPairedReads10RefGenomes	PerMapPairedReads10RefGenomes	Fold_Change_C_parvum	Fold_Change_Ten_Genomes
Unenriched	UKRC_01	UKP301	24.525	1436951	1289130	89.7129	12.8913	119	0.00923103	0.220932	0.0171381	0.00522721	0.000405484	338	0.0262192	NA	NA
Unenriched	UKRC_02	UKP302	23.86	2613897	2344343	89.6877	23.4434	183	0.00780602	1.04558	0.0446003	0.00876175	0.00037374	852	0.0363428	NA	NA
Unenriched	UKRC_03	UKP303	25.365	2674149	2360909	88.2864	23.6091	195	0.00825953	0.456926	0.0193538	0.00726892	0.000307886	550	0.0232961	NA	NA
Unenriched	UKRC_04	UKP304	24.865	3207893	2870532	89.4834	28.7053	154	0.00536486	0.272849	0.00950517	0.00672837	0.000234395	1561	0.0543802	NA	NA
Unenriched	UKRC_05	UKP305	28.665	4381327	3975286	90.7325	39.7529	535	0.0134582	0.918127	0.0230959	0.0200423	0.000504172	1402	0.0352679	NA	NA
Unenriched	UKRC_06	UKP306	25.655	4176480	3717917	89.0203	37.1792	385	0.0103553	0.88113	0.0236996	0.0131673	0.000354159	914	0.0245837	NA	NA
Unenriched	UKRC_07	UKP307	21.08	2857382	2573634	90.0697	25.7363	1386	0.0538538	3.63265	0.141149	0.0527318	0.00204892	2909	0.113031	NA	NA
Unenriched	UKRC_08	UKP308	24.195	3457218	3088377	89.3313	30.8838	439	0.0142146	0.630282	0.0204082	0.0177369	0.000574313	7030	0.227628	NA	NA
Unenriched	UKRC_09	UKH144	30.36	NA	NA	NA	NA	NA	NA	NA	NA	NA	NA	NA	NA	NA	NA
Unenriched	UKRC_10	UKH145	31.72	2373294	2090679	88.0919	20.9068	25	0.00119578	0.047269	0.00226094	0.000916549	4.38398e-05	197	0.00942278	NA	NA
Unenriched	UKRC_11	UKP311	28.175	3497899	3172821	90.7065	31.7282	101	0.00318329	0.217205	0.0068458	0.00332549	0.000104812	649	0.020455	NA	NA
Unenriched	UKRC_12	UKP312	25.645	9699792	8240257	84.9529	82.4026	27746	0.336713	48.2899	0.586024	1.119	0.0135797	61618	0.747768	NA	NA
Unenriched	UKRC_13	UKP313	23.115	3648917	3305264	90.5821	33.0526	713	0.0215717	1.42709	0.0431763	0.0252542	0.000764058	1625	0.049164	NA	NA
Unenriched	UKRC_14	UKP314	23.76	3080137	2807842	91.1596	28.0784	45	0.00160265	0.109337	0.00389398	0.0018434	6.56519e-05	411	0.0146376	NA	NA
Unenriched	UKRC_15	UKP315	25.81	2953450	2674099	90.5415	26.741	215	0.00804009	0.513732	0.0192114	0.00729786	0.000272909	1047	0.0391534	NA	NA
Unenriched	UKRC_16	UKP316	21.2	2473399	2231694	90.2278	22.3169	352	0.0157728	0.94356	0.04228	0.0141283	0.000633075	664	0.0297532	NA	NA
Unenriched	UKRC_17	UKP317	24.2	1826989	1645482	90.0652	16.4548	145	0.00881201	0.231215	0.0140515	0.00538397	0.000327197	409	0.0248559	NA	NA
Unenriched	UKRC_18	UKP318	28.055	1587926	1451949	91.4368	14.5195	75	0.00516547	0.160421	0.0110486	0.00243942	0.00016801	407	0.0280313	NA	NA
Unenriched	UKRC_19	UKP319	27.69	2837208	2580274	90.9441	25.8027	59	0.00228658	0.119203	0.00461978	0.00192935	7.47729e-05	436	0.0168974	NA	NA
Unenriched	UKRC_20	UKP320	22.63	4332485	3861600	89.1313	38.616	2681	0.0694272	5.75113	0.148931	0.0855802	0.00221618	6373	0.165035	NA	NA
Unenriched	UKRC_21	UKP321	26.425	NA	NA	NA	NA	NA	NA	NA	NA	NA	NA	NA	NA	NA	NA
Unenriched	UKRC_22	UKP322	21.94	3736706	3371875	90.2366	33.7188	1032	0.0306061	2.34989	0.0696909	0.0366758	0.0010877	1760	0.0521965	NA	NA
Unenriched	UKRC_23	UKP323	26.755	3201217	2857673	89.2683	28.5767	265	0.00927328	0.459119	0.0160662	0.00957449	0.000335045	1280	0.0447917	NA	NA
Unenriched	UKRC_24	UKP324	26.885	2778849	2483173	89.3598	24.8317	201	0.00809448	0.44706	0.0180036	0.00747731	0.000301119	602	0.0242432	NA	NA
Unenriched	UKRC_25	UKP325	27.98	5052390	4565030	90.3539	45.6503	795	0.017415	1.53259	0.0335724	0.0246325	0.000539591	3727	0.0816424	NA	NA
Unenriched	UKRC_26	UKP326	27.56	2866656	2579124	89.9698	25.7912	555	0.0215189	1.13174	0.0438807	0.0177333	0.000687571	1197	0.0464111	NA	NA
Unenriched	UKRC_27	UKP327	29.19	3541629	3142907	88.7418	31.4291	130	0.0041363	0.289807	0.009221	0.00467658	0.000148798	673	0.0214133	NA	NA
Unenriched	UKRC_28	UKP328	26.125	NA	NA	NA	NA	NA	NA	NA	NA	NA	NA	NA	NA	NA	NA
Unenriched	UKRC_29	UKP329	26.07	3004588	2693559	89.6482	26.9356	1211	0.0449591	2.84255	0.105531	0.0405276	0.00150461	1570	0.0582872	NA	NA
Unenriched	UKRC_30	UKH146	26.3	4974915	4544169	91.3416	45.4417	79	0.00173849	0.150412	0.00331001	0.0029337	6.45597e-05	883	0.0194315	NA	NA
Unenriched	UKRC_31	UKP331	23.085	2922893	2548727	87.1988	25.4873	474	0.0185975	1.20035	0.047096	0.0179392	0.000703849	1031	0.0404516	NA	NA
Unenriched	UKRC_32	UKP332	31.075	5892609	5181119	87.9257	51.8112	2620	0.0505682	5.39015	0.104035	0.0888948	0.00171575	11368	0.219412	NA	NA
Unenriched	UKRC_33	UKP333	26.17	3408734	3100141	90.947	31.0014	770	0.0248376	1.59634	0.0514924	0.0273661	0.000882738	1083	0.0349339	NA	NA
Unenriched	UKRC_34	UKP334	24.155	3691799	3294660	89.2427	32.9466	607	0.0184238	1.22228	0.037099	0.0200227	0.000607731	1265	0.0383955	NA	NA
Unenriched	UKRC_35	UKP335	24.265	2279494	2039339	89.4645	20.3934	48	0.0023537	0.0874016	0.00428578	0.00183496	8.99782e-05	578	0.0283425	NA	NA
Unenriched	UKRC_36	UKP336	23.31	6630862	5945283	89.6608	59.4528	707	0.0118918	2.33911	0.039344	0.0253405	0.000426229	1310	0.0220343	NA	NA
Unenriched	UKRC_37	UKP337	30.085	1768669	1556493	88.0036	15.5649	248	0.0159333	0.532817	0.0342319	0.00815116	0.000523687	381	0.0244781	NA	NA
Unenriched	UKRC_38	UKP338	24.38	NA	NA	NA	NA	NA	NA	NA	NA	NA	NA	NA	NA	NA	NA
Unenriched	UKRC_39	UKP339	25.07	2959980	2672319	90.2817	26.7232	317	0.0118624	0.607645	0.0227385	0.0111919	0.000418807	905	0.0338657	NA	NA
Unenriched	UKRC_40	UKP340	24.45	3824903	3455303	90.337	34.553	212	0.0061355	0.508766	0.0147242	0.00845295	0.000244637	819	0.0237027	NA	NA
Unenriched	UKRC_41	UKP341	23.32	3883532	3520006	90.6393	35.2001	537	0.0152557	1.29028	0.0366557	0.0201849	0.000573434	1490	0.0423295	NA	NA
Unenriched	UKRC_42	UKP342	24.95	3132570	2796221	89.2628	27.9622	145	0.00518557	0.301427	0.0107798	0.00538956	0.000192744	282	0.010085	NA	NA
Unenriched	UKRC_43	UKP343	22.815	3891581	3471258	89.1992	34.7126	14964	0.431083	30.8502	0.888734	0.509049	0.0146647	15706	0.452458	NA	NA
Unenriched	UKRC_44	UKH147	26.6	2360794	2129751	90.2133	21.2975	83	0.00389717	0.379697	0.0178283	0.00336408	0.000157956	354	0.0166217	NA	NA
Unenriched	UKRC_45	UKP345	26.725	2733672	2422659	88.6229	24.2266	402	0.0165933	0.37289	0.0153918	0.0144242	0.000595386	11544	0.476501	NA	NA
Unenriched	UKRC_46	UKP346	27.155	2990475	2739180	91.5968	27.3918	26	0.000949189	0.0451752	0.00164922	0.000906464	3.30925e-05	317	0.0115728	NA	NA
Unenriched	UKRC_47	UKP347	24.03	3520809	2592121	73.6229	25.9212	7476	0.288412	10.1788	0.392681	0.214957	0.0082927	26169	1.00956	NA	NA
Unenriched	UKRC_48	UKP348	24.775	4923154	4537346	92.1634	45.3735	353	0.00777988	0.675446	0.0148864	0.0123543	0.00027228	738	0.016265	NA	NA
Unenriched	UKRC_49	UKP349	25.835	5253729	4840614	92.1367	48.4061	229	0.0047308	0.415895	0.00859177	0.00809744	0.000167281	755	0.0155972	NA	NA
Unenriched	UKRC_50	UKP350	24.215	2802856	2488974	88.8014	24.8897	437	0.0175574	0.218937	0.00879627	0.0203194	0.000816377	8672	0.348417	NA	NA
Unenriched	UKRC_51	UKP351	28.555	3349259	3032926	90.5551	30.3293	335	0.0110454	0.547397	0.0180485	0.0124214	0.000409551	2112	0.0696357	NA	NA
Unenriched	UKRC_52	UKP352	26.23	3081602	2866200	93.0101	28.662	30	0.00104668	0.105467	0.00367969	0.00116298	4.05756e-05	243	0.00847812	NA	NA
Unenriched	UKRC_53	UKP353	28.96	NA	NA	NA	NA	NA	NA	NA	NA	NA	NA	NA	NA	NA	NA
Unenriched	UKRC_54	UKP354	25.32	NA	NA	NA	NA	NA	NA	NA	NA	NA	NA	NA	NA	NA	NA
Unenriched	UKRC_55	UKH148	27.715	3198684	2813081	87.9449	28.1308	549	0.019516	0.977422	0.0347456	0.0167628	0.000595889	1149	0.0408449	NA	NA
Unenriched	UKRC_56	UKP356	26.05	2300684	2016165	87.6333	20.1617	39	0.00193437	0.0618706	0.00306873	0.00131623	6.52839e-05	481	0.0238572	NA	NA
Unenriched	UKRC_57	UKP357	24.31	5155536	4731103	91.7674	47.311	576	0.0121748	1.202	0.0254064	0.0190738	0.000403157	1413	0.0298662	NA	NA
Unenriched	UKRC_58	UKP358	23.6	4858515	4471667	92.0377	44.7167	395	0.00883339	0.727166	0.0162616	0.0144441	0.000323014	1079	0.0241297	NA	NA
Unenriched	UKRC_59	UKP359	22.055	3330499	3044886	91.4243	30.4489	578	0.0189826	1.9005	0.0624163	0.0215525	0.000707828	1519	0.0498869	NA	NA
Unenriched	UKRC_60	UKP360	25.275	2492691	2279538	91.4489	22.7954	14	0.00061416	0.03304	0.00144942	0.000558524	2.45016e-05	150	0.00658028	NA	NA
Unenriched	UKRC_61	UKP361	25.1	4543449	3980809	87.6165	39.8081	3440	0.0864146	5.68304	0.142761	0.109303	0.00274575	8741	0.219578	NA	NA
Unenriched	UKRC_62	UKP362	23.735	3920092	3582775	91.3952	35.8278	636	0.0177516	1.39251	0.0388667	0.0292105	0.000815304	3765	0.105086	NA	NA
Unenriched	UKRC_63	UKP363	24.17	4991619	4506905	90.2894	45.069	827	0.0183496	2.09244	0.0464275	0.0284985	0.00063233	1207	0.0267811	NA	NA
Unenriched	UKRC_64	UKP364	25.155	4907550	4408994	89.841	44.0899	362	0.00821049	0.705198	0.0159945	0.0111731	0.000253416	1297	0.0294171	NA	NA
Unenriched	UKRC_65	UKH149	28.58	9806244	8845363	90.2013	88.4536	1044	0.0118028	0.917415	0.0103717	0.031507	0.000356198	3867	0.0437178	NA	NA
Unenriched	UKRC_66	UKP366	23.79	5064303	4530967	89.4687	45.3097	2992	0.0660345	7.77248	0.171541	0.118859	0.00262326	6295	0.138933	NA	NA
Unenriched	UKRC_67	UKP367	23.815	3224418	2981940	92.4799	29.8194	283	0.00949047	1.18883	0.0398676	0.0113615	0.000381012	797	0.0267276	NA	NA
Unenriched	UKRC_68	UKP368	24.75	7166501	6445490	89.9391	64.4549	5912	0.091723	3.89707	0.060462	0.182811	0.00283627	16642	0.258196	NA	NA
Unenriched	UKRC_69	UKP369	23.535	NA	NA	NA	NA	NA	NA	NA	NA	NA	NA	NA	NA	NA	NA
Unenriched	UKRC_70	UKP370	26.825	4219766	3847806	91.1853	38.4781	4333	0.11261	9.79993	0.254689	0.147808	0.00384135	5267	0.136883	NA	NA
Unenriched	UKRC_71	UKP371	26.645	3547327	3226390	90.9527	32.2639	161	0.0049901	0.282156	0.00874525	0.00636289	0.000197214	867	0.0268721	NA	NA
Unenriched	UKRC_72	UKP372	25.13	5244660	4771558	90.9794	47.7156	3550	0.0743992	3.00182	0.0629107	0.105261	0.002206	6291	0.131844	NA	NA
Unenriched	UKRC_73	UKH150	24.425	2753985	2547223	92.4923	25.4722	113	0.0044362	0.253841	0.00996538	0.00425925	0.000167212	449	0.017627	NA	NA
Unenriched	UKRC_74	UKP374	23.38	8431902	7525347	89.2485	75.2535	8127	0.107995	17.194	0.228481	0.287722	0.00382337	19467	0.258686	NA	NA
Unenriched	UKRC_75	UKP375	27.765	2326711	2139056	91.9348	21.3906	131	0.0061242	0.288492	0.0134869	0.00453999	0.000212243	221	0.0103317	NA	NA
Unenriched	UKRC_76	UKP376	22.655	2480046	2221149	89.5608	22.2115	217	0.00976972	0.430551	0.0193842	0.00907231	0.000408451	2047	0.0921595	NA	NA
Unenriched	UKRC_77	UKP377	22.055	2792469	2380638	85.2521	23.8064	128	0.00537671	0.225712	0.00948114	0.00432415	0.000181638	543	0.022809	NA	NA
Unenriched	UKRC_78	UKP378	25.115	NA	NA	NA	NA	NA	NA	NA	NA	NA	NA	NA	NA	NA	NA
Unenriched	UKRC_79	UKP379	23.68	3082618	2832133	91.8743	28.3213	47	0.00165953	0.0622214	0.00219698	0.00213598	7.54196e-05	1508	0.0532461	NA	NA
Unenriched	UKRC_80	UKP380	20.13	4680058	4288686	91.6375	42.8869	960	0.0223845	3.70913	0.0864865	0.036666	0.000854947	2532	0.0590391	NA	NA
Unenriched	UKRC_81	UKP381	26.03	2302273	2120068	92.0859	21.2007	39	0.00183956	0.0777548	0.00366756	0.00125572	5.92301e-05	1109	0.0523096	NA	NA
Unenriched	UKRC_82	UKP382	25.565	4458750	3968391	89.0023	39.6839	477	0.01202	1.10901	0.0279461	0.0165622	0.000417354	1026	0.0258543	NA	NA
Unenriched	UKRC_83	UKP383	18.905	3160323	2792225	88.3525	27.9222	770	0.0275766	1.81545	0.065018	0.0273661	0.000980083	3648	0.130648	NA	NA
Unenriched	UKRC_84	UKP384	20.11	4418215	4084118	92.4382	40.8412	692	0.0169437	2.19004	0.0536233	0.0294426	0.000720904	966	0.0236526	NA	NA
Unenriched	UKRC_85	UKP385	22.09	2334670	2101590	90.0166	21.0159	426	0.0202704	1.14387	0.0544289	0.0167529	0.000797152	1850	0.0880286	NA	NA
Unenriched	UKRC_86	UKP386	23.45	925841	656325	70.8896	6.56325	11	0.001676	0.0201595	0.00307157	0.000411082	6.26339e-05	101	0.0153887	NA	NA
Unenriched	UKRC_87	UKP387	23.92	3484028	3177053	91.1891	31.7705	587	0.0184762	1.95724	0.0616057	0.0226678	0.000713486	3178	0.10003	NA	NA
Unenriched	UKRC_88	UKP388	26.475	4095549	3709357	90.5704	37.0936	2865	0.0772371	3.4502	0.0930133	0.0933825	0.00251749	9154	0.246781	NA	NA
Unenriched	UKRC_89	UKP389	29.71	3532338	3199384	90.5741	31.9938	169	0.00528227	0.624757	0.0195274	0.00597988	0.000186907	495	0.0154717	NA	NA
Unenriched	UKRC_90	UKP390	29.07	1836002	1686633	91.8644	16.8663	17	0.00100793	0.0371838	0.00220461	0.00068141	4.04006e-05	106	0.00628471	NA	NA
Unenriched	UKRC_91	UKP391	22.035	5266442	4554294	86.4776	45.5429	10030	0.220232	5.81954	0.127781	0.322465	0.00708045	24998	0.548889	NA	NA
Unenriched	UKRC_92	UKP392	23.93	2215341	1985617	89.6303	19.8562	315	0.0158641	0.316051	0.015917	0.0131065	0.000660072	12590	0.63406	NA	NA
Unenriched	UKRC_93	UKP393	22.505	5393599	4922099	91.2582	49.221	1755	0.0356555	5.27762	0.107223	0.0638674	0.00129756	4309	0.087544	NA	NA
Unenriched	UKRC_94	UKP394	25.84	1924563	1771901	92.0677	17.719	45	0.00253965	0.0768121	0.00433501	0.00176568	9.96489e-05	797	0.0449799	NA	NA
Unenriched	UKRC_95	UKP395A	25.16	2372397	2097570	88.4156	20.9757	109	0.00519649	0.258346	0.0123164	0.00363265	0.000173184	455	0.0216918	NA	NA
Unenriched	UKRC_96	UKP395B	24.88	NA	NA	NA	NA	NA	NA	NA	NA	NA	NA	NA	NA	NA	NA
Unenriched	UKRC_97	UKH151	37.81	5185992	4729450	91.1966	47.2945	19	0.000401738	0.064644	0.00136684	0.000620789	1.3126e-05	608	0.0128556	NA	NA
Unenriched	UKRC_98	UKP398	25.575	5024080	4574096	91.0435	45.741	3576	0.0781794	8.68037	0.189772	0.131142	0.00286706	6309	0.137929	NA	NA
Unenriched	UKRC_99	UKP399	27.59	3853963	3474117	90.144	34.7412	507	0.0145936	1.32049	0.0380095	0.0231125	0.000665276	795	0.0228835	NA	NA
Unenriched	UKRC_100	UKP400	28.995	4728531	4293709	90.8043	42.9371	875	0.0203787	1.16228	0.0270693	0.0272645	0.000634987	2369	0.0551737	NA	NA
Single-enriched	UKRC_01	UKP301	24.525	504350	462706	91.743	4.62706	66413	14.3532	17.2301	3.72376	2.99264	0.64677	72589	15.6879	1554.88	598.337
Single-enriched	UKRC_02	UKP302	23.86	3050949	2798140	91.7138	27.9814	208324	7.44509	64.0183	2.28789	9.41151	0.336349	209766	7.49662	953.762	206.275
Single-enriched	UKRC_03	UKP303	25.365	2319619	2097302	90.4158	20.973	204870	9.76826	52.7103	2.51324	7.62827	0.363718	216791	10.3367	1182.67	443.708
Single-enriched	UKRC_04	UKP304	24.865	4597579	4243662	92.3021	42.4366	167050	3.93646	39.228	0.92439	5.97717	0.140849	181796	4.28394	733.749	78.7777
Single-enriched	UKRC_05	UKP305	28.665	3767534	3469387	92.0864	34.6939	586641	16.9091	70.9001	2.04359	19.7624	0.569624	616023	17.756	1256.42	503.46
Single-enriched	UKRC_06	UKP306	25.655	5035958	4487985	89.1188	44.8798	533659	11.8908	64.9313	1.44678	15.7703	0.35139	771814	17.1973	1148.29	699.544
Single-enriched	UKRC_07	UKP307	21.08	5401223	4998909	92.5514	49.9891	2212510	44.2599	98.4413	1.96925	84.431	1.68899	2214783	44.3053	821.852	391.976
Single-enriched	UKRC_08	UKP308	24.195	4793666	4157803	86.7354	41.578	258587	6.21932	40.8958	0.983591	8.44544	0.203123	355531	8.55093	437.531	37.5654
Single-enriched	UKRC_09	UKH144	30.36	NA	NA	NA	NA	NA	NA	NA	NA	NA	NA	NA	NA	NA	NA
Single-enriched	UKRC_10	UKH145	31.72	1589790	1424170	89.5823	14.2417	31254	2.19454	11.4385	0.803173	1.07909	0.07577	65264	4.5826	1835.23	486.332
Single-enriched	UKRC_11	UKP311	28.175	7269016	6761657	93.0203	67.6166	134265	1.98568	30.1802	0.446343	4.38929	0.0649144	165515	2.44785	623.783	119.67
Single-enriched	UKRC_12	UKP312	25.645	33731557	30900075	91.6058	309.001	4724472	15.2895	99.9759	0.323546	199.944	0.647067	14195438	45.9398	45.4082	61.4359
Single-enriched	UKRC_13	UKP313	23.115	4616460	4173973	90.415	41.7397	935354	22.4092	79.5232	1.90522	25.346	0.607238	1295415	31.0355	1038.83	631.266
Single-enriched	UKRC_14	UKP314	23.76	1536431	1414947	92.0931	14.1495	76262	5.38974	18.9973	1.34261	3.19485	0.225793	92778	6.55699	3363.01	447.956
Single-enriched	UKRC_15	UKP315	25.81	6480923	5962285	91.9975	59.6228	404924	6.79142	40.1899	0.674068	8.98094	0.150629	627537	10.5251	844.695	268.817
Single-enriched	UKRC_16	UKP316	21.2	4472143	4113870	91.9888	41.1387	599314	14.5681	73.5078	1.78683	22.2172	0.540055	706749	17.1797	923.625	577.406
Single-enriched	UKRC_17	UKP317	24.2	978496	888653	90.8183	8.88653	112514	12.6612	33.8325	3.80717	3.49788	0.393616	152555	17.167	1436.81	690.66
Single-enriched	UKRC_18	UKP318	28.055	510014	479488	94.0147	4.79488	63446	13.232	33.9037	7.07081	2.10867	0.439775	63957	13.3386	2561.63	475.847
Single-enriched	UKRC_19	UKP319	27.69	1986151	1848868	93.088	18.4887	96166	5.20134	19.5444	1.0571	3.12446	0.168993	106575	5.76434	2274.73	341.137
Single-enriched	UKRC_20	UKP320	22.63	6157797	5751202	93.3971	57.512	2422370	42.1194	98.4877	1.71247	83.9924	1.46043	2430988	42.2692	606.67	256.122
Single-enriched	UKRC_21	UKP321	26.425	NA	NA	NA	NA	NA	NA	NA	NA	NA	NA	NA	NA	NA	NA
Single-enriched	UKRC_22	UKP322	21.94	5367653	4831997	90.0207	48.32	1640646	33.9538	92.454	1.91337	57.032	1.1803	1822343	37.7141	1109.38	722.541
Single-enriched	UKRC_23	UKP323	26.755	922332	805142	87.2942	8.05142	135030	16.771	47.3721	5.88369	4.47776	0.556146	160135	19.889	1808.52	444.034
Single-enriched	UKRC_24	UKP324	26.885	2436045	2235224	91.7563	22.3522	233564	10.4492	59.8329	2.67682	8.7869	0.393111	243458	10.8919	1290.91	449.276
Single-enriched	UKRC_25	UKP325	27.98	6160058	5546684	90.0427	55.4668	557110	10.044	49.4577	0.891662	10.8855	0.196253	1002704	18.0775	576.745	221.423
Single-enriched	UKRC_26	UKP326	27.56	7961335	6793213	85.3276	67.9321	815966	12.0115	65.846	0.96929	18.7411	0.27588	1297657	19.1023	558.182	411.588
Single-enriched	UKRC_27	UKP327	29.19	4420418	3941492	89.1656	39.4149	139549	3.54051	40.2535	1.02127	4.91454	0.124687	147349	3.73841	855.962	174.583
Single-enriched	UKRC_28	UKP328	26.125	NA	NA	NA	NA	NA	NA	NA	NA	NA	NA	NA	NA	NA	NA
Single-enriched	UKRC_29	UKP329	26.07	3369135	3095372	91.8744	30.9537	1390244	44.9136	97.8847	3.16229	47.6454	1.53925	1425464	46.0515	998.989	790.079
Single-enriched	UKRC_30	UKH146	26.3	2662536	2473500	92.9002	24.735	57662	2.33119	20.6987	0.83682	2.13411	0.0862789	83734	3.38524	1340.93	174.214
Single-enriched	UKRC_31	UKP331	23.085	2692838	2430839	90.2705	24.3084	518602	21.3343	85.6556	3.5237	19.7643	0.813064	521905	21.4702	1147.16	530.762
Single-enriched	UKRC_32	UKP332	31.075	5461726	4939397	90.4366	49.394	1294776	26.2132	90.3764	1.8297	49.2788	0.997669	1314885	26.6204	518.374	121.326
Single-enriched	UKRC_33	UKP333	26.17	2735706	2509503	91.7315	25.095	814068	32.4394	90.8541	3.6204	29.9067	1.19174	855218	34.0792	1306.06	975.533
Single-enriched	UKRC_34	UKP334	24.155	9695921	8833691	91.1073	88.3369	973984	11.0258	79.4129	0.898978	24.4111	0.276341	1405398	15.9095	598.455	414.359
Single-enriched	UKRC_35	UKP335	24.265	1513727	1378684	91.0788	13.7868	46651	3.38373	16.5734	1.20211	1.77373	0.128654	50471	3.66081	1437.62	129.163
Single-enriched	UKRC_36	UKP336	23.31	5044310	4661415	92.4094	46.6142	1053704	22.6048	81.2355	1.74272	40.07	0.85961	1046263	22.4452	1900.88	1018.65
Single-enriched	UKRC_37	UKP337	30.085	1350393	1230812	91.1447	12.3081	386854	31.4308	43.3077	3.51862	13.2646	1.07771	393492	31.9701	1972.65	1306.07
Single-enriched	UKRC_38	UKP338	24.38	NA	NA	NA	NA	NA	NA	NA	NA	NA	NA	NA	NA	NA	NA
Single-enriched	UKRC_39	UKP339	25.07	2225359	2020937	90.814	20.2094	319237	15.7965	63.8576	3.1598	11.1976	0.554077	383404	18.9716	1331.65	560.201
Single-enriched	UKRC_40	UKP340	24.45	6487880	6038428	93.0724	60.3843	266236	4.40903	44.1025	0.730365	10.6125	0.17575	306447	5.07495	718.61	214.108
Single-enriched	UKRC_41	UKP341	23.32	6087313	5680804	93.322	56.808	875448	15.4106	83.2305	1.46512	33.0192	0.581241	881153	15.5111	1010.16	366.436
Single-enriched	UKRC_42	UKP342	24.95	3856351	3572409	92.637	35.7241	162964	4.56174	35.0597	0.981402	6.67918	0.186966	177625	4.97214	879.699	493.021
Single-enriched	UKRC_43	UKP343	22.815	25345554	23163166	91.3895	231.632	15957290	68.8908	99.9991	0.431716	546.968	2.36137	16344542	70.5626	159.809	155.954
Single-enriched	UKRC_44	UKH147	26.6	1198923	1097661	91.5539	10.9766	122083	11.1221	17.8583	1.62694	4.97628	0.453353	132663	12.086	2853.89	727.122
Single-enriched	UKRC_45	UKP345	26.725	6236229	5489849	88.0315	54.8985	83766	1.52583	13.294	0.242156	2.0733	0.0377661	158395	2.88523	91.9546	6.05504
Single-enriched	UKRC_46	UKP346	27.155	732423	689189	94.0971	6.89189	13274	1.92603	4.47478	0.649282	0.461233	0.066924	16800	2.43765	2029.13	210.636
Single-enriched	UKRC_47	UKP347	24.03	10885789	9135761	83.9237	91.3576	3097736	33.9078	86.0002	0.941357	84.674	0.926841	3890621	42.5867	117.567	42.1835
Single-enriched	UKRC_48	UKP348	24.775	2777222	2601161	93.6605	26.0116	331050	12.727	47.5116	1.82656	12.7862	0.491556	358074	13.7659	1635.89	846.352
Single-enriched	UKRC_49	UKP349	25.835	3268157	3068358	93.8865	30.6836	201793	6.57658	39.9757	1.30284	7.49605	0.244302	249040	8.11639	1390.16	520.375
Single-enriched	UKRC_50	UKP350	24.215	2178964	1778071	81.6017	17.7807	26991	1.51799	6.31862	0.355364	0.927664	0.0521725	54860	3.08537	86.4587	8.85539
Single-enriched	UKRC_51	UKP351	28.555	4399274	3893287	88.4984	38.9329	416521	10.6984	53.2617	1.36804	12.9536	0.332717	642259	16.4966	968.584	236.898
Single-enriched	UKRC_52	UKP352	26.23	3440914	3258820	94.708	32.5882	31996	0.981828	7.39458	0.22691	1.29137	0.039627	41198	1.2642	938.038	149.113
Single-enriched	UKRC_53	UKP353	28.96	NA	NA	NA	NA	NA	NA	NA	NA	NA	NA	NA	NA	NA	NA
Single-enriched	UKRC_54	UKP354	25.32	NA	NA	NA	NA	NA	NA	NA	NA	NA	NA	NA	NA	NA	NA
Single-enriched	UKRC_55	UKH148	27.715	872101	777747	89.1808	7.77747	232540	29.8992	61.6603	7.92807	8.13578	1.04607	257929	33.1636	1532.04	811.94
Single-enriched	UKRC_56	UKP356	26.05	1752865	1595169	91.0035	15.9517	40759	2.55515	15.9719	1.00127	1.63929	0.102766	52069	3.26417	1320.93	136.821
Single-enriched	UKRC_57	UKP357	24.31	3457090	3279689	94.8685	32.7969	692362	21.1106	74.2176	2.26295	24.8327	0.757167	689668	21.0285	1733.97	704.089
Single-enriched	UKRC_58	UKP358	23.6	3441619	3235137	94.0004	32.3514	351585	10.8677	62.0121	1.91683	14.282	0.441466	355429	10.9865	1230.3	455.311
Single-enriched	UKRC_59	UKP359	22.055	1205243	1134812	94.1563	11.3481	383342	33.7802	72.7192	6.40804	15.2667	1.34531	385319	33.9544	1779.53	680.628
Single-enriched	UKRC_60	UKP360	25.275	3711160	3495535	94.1898	34.9554	20202	0.577937	4.13913	0.118412	0.73091	0.0209098	45386	1.2984	941.021	197.317
Single-enriched	UKRC_61	UKP361	25.1	5891155	4992599	84.7474	49.926	1575803	31.5628	84.6938	1.69639	51.1542	1.0246	1925817	38.5734	365.248	175.67
Single-enriched	UKRC_62	UKP362	23.735	1708273	1559605	91.2972	15.596	386070	24.7543	73.4229	4.70779	18.9467	1.21484	380384	24.3898	1394.49	232.093
Single-enriched	UKRC_63	UKP363	24.17	1401388	1313184	93.706	13.1318	596904	45.4547	42.1202	3.20749	21.3956	1.62929	21167	1.61188	2477.15	60.1873
Single-enriched	UKRC_64	UKP364	25.155	3479377	3239034	93.0924	32.3903	338579	10.4531	57.9987	1.79062	11.721	0.361868	385687	11.9075	1273.14	404.78
Single-enriched	UKRC_65	UKH149	28.58	6002716	5220741	86.973	52.2074	424875	8.13821	26.3526	0.504767	5.25173	0.100594	1008194	19.3113	689.516	441.726
Single-enriched	UKRC_66	UKP366	23.79	17030549	15367331	90.2339	153.673	5077945	33.0438	99.6472	0.648436	196.192	1.27668	5630619	36.6402	500.402	263.726
Single-enriched	UKRC_67	UKP367	23.815	5165437	4888109	94.6311	48.8811	404283	8.27074	59.3709	1.2146	16.5052	0.337661	423353	8.66087	871.479	324.043
Single-enriched	UKRC_68	UKP368	24.75	16153819	12220152	75.6487	122.202	1506742	12.33	76.7053	0.627695	29.8146	0.243979	2738625	22.4107	134.426	86.7973
Single-enriched	UKRC_69	UKP369	23.535	NA	NA	NA	NA	NA	NA	NA	NA	NA	NA	NA	NA	NA	NA
Single-enriched	UKRC_70	UKP370	26.825	9597919	9014938	93.926	90.1494	4219520	46.8059	99.829	1.10737	158.433	1.75745	4301337	47.7134	415.647	348.57
Single-enriched	UKRC_71	UKP371	26.645	2366544	2147351	90.7378	21.4735	149894	6.98041	34.2784	1.59631	6.08694	0.283463	172849	8.04941	1398.85	299.545
Single-enriched	UKRC_72	UKP372	25.13	23062748	19717836	85.4965	197.178	2749602	13.9447	74.4852	0.377755	36.5487	0.185358	5459003	27.6856	187.431	209.988
Single-enriched	UKRC_73	UKH150	24.425	577392	539862	93.5001	5.39862	70953	13.1428	23.1489	4.28792	2.63287	0.487693	86020	15.9337	2962.62	903.935
Single-enriched	UKRC_74	UKP374	23.38	14662455	13121941	89.4935	131.219	3862326	29.4341	98.3161	0.74925	141.735	1.08014	4484937	34.1789	272.551	132.125
Single-enriched	UKRC_75	UKP375	27.765	2953789	2780560	94.1354	27.8056	233431	8.39511	38.7876	1.39496	8.22738	0.295889	249595	8.97643	1370.81	868.827
Single-enriched	UKRC_76	UKP376	22.655	3760361	3422262	91.0089	34.2226	282550	8.25624	57.0438	1.66684	11.7428	0.34313	310241	9.06538	845.084	98.3662
Single-enriched	UKRC_77	UKP377	22.055	4491240	4020584	89.5206	40.2058	146944	3.65479	20.1799	0.501913	3.96555	0.0986312	225655	5.61249	679.745	246.065
Single-enriched	UKRC_78	UKP378	25.115	NA	NA	NA	NA	NA	NA	NA	NA	NA	NA	NA	NA	NA	NA
Single-enriched	UKRC_79	UKP379	23.68	1068227	979672	91.7101	9.79672	19654	2.00618	6.20595	0.633472	0.753075	0.0768701	35398	3.61325	1208.89	67.8594
Single-enriched	UKRC_80	UKP380	20.13	5642258	5290419	93.7642	52.9042	1458799	27.5744	88.1848	1.66688	57.6007	1.08877	1469507	27.7768	1231.85	470.481
Single-enriched	UKRC_81	UKP381	26.03	3077531	2868640	93.2124	28.6864	41359	1.44176	4.67194	0.162863	0.948011	0.0330474	93647	3.26451	783.753	62.4074
Single-enriched	UKRC_82	UKP382	25.565	6427173	5985813	93.1329	59.8581	750386	12.5361	80.795	1.34977	26.192	0.437568	769124	12.8491	1042.94	496.982
Single-enriched	UKRC_83	UKP383	18.905	5499251	5102023	92.7767	51.0202	1043707	20.4567	92.0826	1.80483	37.2699	0.730493	1070455	20.981	741.815	160.591
Single-enriched	UKRC_84	UKP384	20.11	3295631	3058607	92.8079	30.5861	653963	21.3811	89.1032	2.9132	29.0581	0.950043	714653	23.3653	1261.89	987.854
Single-enriched	UKRC_85	UKP385	22.09	3558515	3226400	90.667	32.264	548291	16.9939	83.5927	2.5909	21.9569	0.680538	555424	17.215	838.361	195.561
Single-enriched	UKRC_86	UKP386	23.45	1069184	870233	81.3923	8.70233	16514	1.89765	8.60831	0.989196	0.685056	0.078721	24193	2.78006	1132.25	180.656
Single-enriched	UKRC_87	UKP387	23.92	3612610	3324136	92.0148	33.2414	881705	26.5243	69.9186	2.10336	36.8234	1.10776	882109	26.5365	1435.59	265.286
Single-enriched	UKRC_88	UKP388	26.475	5554251	4883402	87.9219	48.834	1459697	29.891	80.8883	1.65639	41.6788	0.853479	1890172	38.706	387.003	156.844
Single-enriched	UKRC_89	UKP389	29.71	3338029	3094617	92.7079	30.9462	222949	7.20441	35.6547	1.15215	7.86885	0.254276	270877	8.75317	1363.89	565.752
Single-enriched	UKRC_90	UKP390	29.07	835014	787639	94.3264	7.87639	29291	3.71884	9.55858	1.21357	1.05448	0.133879	44811	5.68928	3689.59	905.258
Single-enriched	UKRC_91	UKP391	22.035	31610582	23719341	75.0361	237.193	2414774	10.1806	83.518	0.352109	38.3338	0.161614	4768257	20.1028	46.2268	36.6246
Single-enriched	UKRC_92	UKP392	23.93	3064275	2538581	82.8444	25.3858	44868	1.76744	5.94554	0.234207	1.26258	0.0497358	105065	4.13873	111.412	6.52735
Single-enriched	UKRC_93	UKP393	22.505	2407520	2248422	93.3916	22.4842	1001244	44.531	84.3024	3.7494	40.0164	1.77975	989984	44.0302	1248.92	502.949
Single-enriched	UKRC_94	UKP394	25.84	3037108	2852841	93.9328	28.5284	44949	1.57559	12.3962	0.434521	1.61277	0.056532	57971	2.03204	620.397	45.1767
Single-enriched	UKRC_95	UKP395A	25.16	1311763	1173235	89.4396	11.7324	100295	8.54859	38.1681	3.25324	3.6605	0.312001	100752	8.58754	1645.07	395.889
Single-enriched	UKRC_96	UKP395B	24.88	NA	NA	NA	NA	NA	NA	NA	NA	NA	NA	NA	NA	NA	NA
Single-enriched	UKRC_97	UKH151	37.81	4229825	3959498	93.609	39.595	5150	0.130067	1.54497	0.0390193	0.176817	0.00446564	11924	0.301149	323.761	23.4255
Single-enriched	UKRC_98	UKP398	25.575	10999917	10303509	93.669	103.035	3916192	38.0083	99.8901	0.969476	162.549	1.57761	3897561	37.8275	486.168	274.254
Single-enriched	UKRC_99	UKP399	27.59	3356079	3111726	92.7191	31.1173	580264	18.6477	88.6045	2.84744	26.9497	0.86607	575249	18.4865	1277.79	807.852
Single-enriched	UKRC_100	UKP400	28.995	6704297	5963061	88.9439	59.6306	889017	14.9087	76.3944	1.28113	19.5343	0.327588	1335437	22.3952	731.586	405.902
Double-enriched	UKRC_01	UKP301	24.525	172318	164236	95.3098	1.64236	98675	60.08	12.41	7.5562	3.97	2.41725	99057	60.31	4.18583	3.84436
Double-enriched	UKRC_02	UKP302	23.86	470767	440184	93.5036	4.40184	250642	56.94	50.18	11.3998	10	2.27178	247431	56.21	7.648	7.49804
Double-enriched	UKRC_03	UKP303	25.365	344873	323329	93.7531	3.23329	224738	69.51	40.16	12.4208	7.45	2.30415	224700	69.5	7.1159	6.72364
Double-enriched	UKRC_04	UKP304	24.865	229555	216039	94.1121	2.16039	141015	65.27	28.12	13.0162	4.41	2.0413	140881	65.21	16.5809	15.222
Double-enriched	UKRC_05	UKP305	28.665	1589350	1517312	95.4675	15.1731	1356839	89.42	60.55	3.99061	40.17	2.64744	1355202	89.32	5.28829	5.03042
Double-enriched	UKRC_06	UKP306	25.655	1356421	1288362	94.9825	12.8836	916996	71.18	55.08	4.2752	29.08	2.25713	937097	72.74	5.98612	4.22972
Double-enriched	UKRC_07	UKP307	21.08	12944759	12346745	95.3803	123.467	9915691	80.31	95.05	0.769839	323.76	2.62223	9836668	79.67	1.81451	1.7982
Double-enriched	UKRC_08	UKP308	24.195	363382	332541	91.5128	3.32541	158228	47.58	28.35	8.52526	5.81	1.74715	161092	48.44	7.65036	5.66488
Double-enriched	UKRC_09	UKH144	30.36	NA	NA	NA	NA	NA	NA	NA	NA	NA	NA	NA	NA	NA	NA
Double-enriched	UKRC_10	UKH145	31.72	91673	85243	92.9859	0.85243	41192	48.32	7.6	8.91569	1.37	1.60717	47754	56.02	22.0183	12.2245
Double-enriched	UKRC_11	UKP311	28.175	162144	153504	94.6714	1.53504	93870	61.15	20.42	13.3026	2.76	1.798	95903	62.48	30.7955	25.5245
Double-enriched	UKRC_12	UKP312	25.645	64217412	61259433	95.3938	612.594	33982587	55.47	99.98	0.163208	1497.9	2.44517	33520923	54.72	3.62798	1.19112
Double-enriched	UKRC_13	UKP313	23.115	1205718	1146986	95.1289	11.4699	838474	73.1	65.34	5.69667	21.64	1.88668	842739	73.47	3.26205	2.36729
Double-enriched	UKRC_14	UKP314	23.76	390719	365568	93.5629	3.65568	245473	67.15	15.31	4.188	11.59	3.17041	245185	67.07	12.4589	10.2288
Double-enriched	UKRC_15	UKP315	25.81	485303	456556	94.0765	4.56556	253448	55.51	32.89	7.20394	8.66	1.89681	275394	60.32	8.17354	5.73106
Double-enriched	UKRC_16	UKP316	21.2	847732	787758	92.9254	7.87758	524591	66.59	58.54	7.43122	15.51	1.96888	529270	67.19	4.57094	3.91102
Double-enriched	UKRC_17	UKP317	24.2	225957	215935	95.5646	2.15935	178614	82.72	25.64	11.8739	7.91	3.66314	179436	83.1	6.53335	4.84068
Double-enriched	UKRC_18	UKP318	28.055	172433	165445	95.9474	1.65445	148279	89.62	29.5	17.8307	4.46	2.69576	147928	89.41	6.77296	6.7031
Double-enriched	UKRC_19	UKP319	27.69	503225	485375	96.4529	4.85375	446500	91.99	15.8	3.25522	10.71	2.20654	448426	92.39	17.6858	16.0279
Double-enriched	UKRC_20	UKP320	22.63	4806785	4591355	95.5182	45.9136	3943183	85.88	93.37	2.0336	95.77	2.08588	3927234	85.54	2.03897	2.02369
Double-enriched	UKRC_21	UKP321	26.425	NA	NA	NA	NA	NA	NA	NA	NA	NA	NA	NA	NA	NA	NA
Double-enriched	UKRC_22	UKP322	21.94	14399497	13466409	93.52	134.664	10792144	80.14	89.18	0.66224	265.96	1.97499	10822503	80.37	2.36027	2.13103
Double-enriched	UKRC_23	UKP323	26.755	361840	339779	93.9031	3.39779	290340	85.45	41.21	12.1285	72.93	21.464	289829	85.3	5.09512	4.28879
Double-enriched	UKRC_24	UKP324	26.885	412357	386136	93.6412	3.86136	283624	73.45	47.56	12.3169	8.8	2.27899	283290	73.37	7.02922	6.73621
Double-enriched	UKRC_25	UKP325	27.98	666027	630059	94.5996	6.30059	364740	57.89	40.64	6.45019	11.29	1.7919	385317	61.16	5.76363	3.3832
Double-enriched	UKRC_26	UKP326	27.56	643075	589151	91.6147	5.89151	315987	53.63	45.56	7.73316	10.73	1.82126	340814	57.85	4.46489	3.02844
Double-enriched	UKRC_27	UKP327	29.19	251447	235491	93.6543	2.35491	168755	71.66	30.78	13.0706	6.12	2.59883	168268	71.45	20.24	19.1124
Double-enriched	UKRC_28	UKP328	26.125	NA	NA	NA	NA	NA	NA	NA	NA	NA	NA	NA	NA	NA	NA
Double-enriched	UKRC_29	UKP329	26.07	13410370	12709410	94.773	127.094	11489516	90.4	95.5	0.751412	407.65	3.20747	11459110	90.16	2.01275	1.95781
Double-enriched	UKRC_30	UKH146	26.3	195685	186349	95.2291	1.86349	132403	71.05	17.7	9.49831	4.93	2.64557	140678	75.49	30.478	22.2997
Double-enriched	UKRC_31	UKP331	23.085	907836	839587	92.4822	8.39587	634734	75.6	72.65	8.65306	25.1	2.98957	629018	74.92	3.54359	3.48949
Double-enriched	UKRC_32	UKP332	31.075	3051255	2910502	95.387	29.105	2168314	74.5	83.05	2.85346	88.43	3.03831	2153687	74	2.84208	2.77983
Double-enriched	UKRC_33	UKP333	26.17	1128486	1068616	94.6947	10.6862	840386	78.64	77.06	7.2112	32.02	2.9964	835789	78.21	2.42421	2.29495
Double-enriched	UKRC_34	UKP334	24.155	1095765	1023239	93.3812	10.2324	739774	72.3	68.17	6.66218	25.89	2.5302	769840	75.24	6.55735	4.72924
Double-enriched	UKRC_35	UKP335	24.265	217448	205894	94.6865	2.05894	139699	67.85	14.54	7.06189	5.68	2.7587	138763	67.4	20.0518	18.4112
Double-enriched	UKRC_36	UKP336	23.31	3082151	2936758	95.2827	29.3676	2229828	75.93	72.38	2.46462	90.17	3.07039	2186142	74.44	3.35902	3.31652
Double-enriched	UKRC_37	UKP337	30.085	512390	479918	93.6626	4.79918	417885	87.07	35.82	7.46378	14.74	3.07136	415753	86.63	2.77021	2.70972
Double-enriched	UKRC_38	UKP338	24.38	NA	NA	NA	NA	NA	NA	NA	NA	NA	NA	NA	NA	NA	NA
Double-enriched	UKRC_39	UKP339	25.07	2651331	2513475	94.8005	25.1348	1881108	74.84	58.66	2.33382	75.14	2.98949	1897668	75.5	4.73776	3.97963
Double-enriched	UKRC_40	UKP340	24.45	1431527	1374684	96.0292	13.7468	956645	69.59	37.95	2.76063	40.5	2.94613	958372	69.72	15.7835	13.7381
Double-enriched	UKRC_41	UKP341	23.32	4623420	4456688	96.3938	44.5669	3541904	79.47	74.44	1.6703	137.86	3.09333	3523805	79.07	5.15683	5.09765
Double-enriched	UKRC_42	UKP342	24.95	427568	408587	95.5607	4.08587	245256	60.03	27.88	6.82352	11.24	2.75094	241581	59.13	13.1595	11.8923
Double-enriched	UKRC_43	UKP343	22.815	31893386	29847075	93.5839	298.471	26351856	88.29	99.99	0.335008	943.58	3.16138	26308908	88.15	1.28159	1.24924
Double-enriched	UKRC_44	UKH147	26.6	702138	660936	94.1319	6.60936	456899	69.13	14.63	2.21353	19.83	3.00029	464400	70.26	6.21555	5.81335
Double-enriched	UKRC_45	UKP345	26.725	215042	191430	89.0198	1.9143	33743	17.63	9.4	4.91041	1.32	0.689547	36338	18.98	11.5543	6.57832
Double-enriched	UKRC_46	UKP346	27.155	29209	27862	95.3884	0.27862	17321	62.17	2.92	10.4802	0.65	2.33293	16964	60.89	32.2788	24.979
Double-enriched	UKRC_47	UKP347	24.03	4282111	4097640	95.6921	40.9764	3571710	87.17	81.83	1.997	121.74	2.97098	3593041	87.69	2.57079	2.05909
Double-enriched	UKRC_48	UKP348	24.775	1534270	1468518	95.7144	14.6852	1061155	72.26	40.47	2.75584	43.2	2.94174	1042109	70.96	5.67769	5.15476
Double-enriched	UKRC_49	UKP349	25.835	456915	436564	95.546	4.36564	270210	61.89	31.32	7.17421	10.74	2.46012	273056	62.55	9.41067	7.70663
Double-enriched	UKRC_50	UKP350	24.215	142353	117697	82.6797	1.17697	17349	14.74	4.22	3.58548	0.77	0.654222	18264	15.52	9.71019	5.0302
Double-enriched	UKRC_51	UKP351	28.555	819567	776144	94.7017	7.76144	398432	51.33	42.46	5.47063	21	2.70568	401140	51.68	4.7979	3.13277
Double-enriched	UKRC_52	UKP352	26.23	124492	118341	95.0591	1.18341	50218	42.43	7.21	6.09256	2.17	1.83368	50249	42.46	43.2153	33.5865
Double-enriched	UKRC_53	UKP353	28.96	NA	NA	NA	NA	NA	NA	NA	NA	NA	NA	NA	NA	NA	NA
Double-enriched	UKRC_54	UKP354	25.32	NA	NA	NA	NA	NA	NA	NA	NA	NA	NA	NA	NA	NA	NA
Double-enriched	UKRC_55	UKH148	27.715	481030	461308	95.9	4.61308	364596	79.04	50	10.8387	13.75	2.98066	376032	81.51	2.64355	2.45781
Double-enriched	UKRC_56	UKP356	26.05	98779	92638	93.7831	0.92638	42164	45.51	12.3	13.2775	1.93	2.08338	42715	46.11	17.8111	14.1261
Double-enriched	UKRC_57	UKP357	24.31	1067891	1024311	95.9191	10.2431	821452	80.2	59.84	5.84198	30.95	3.02154	813113	79.38	3.79904	3.77488
Double-enriched	UKRC_58	UKP358	23.6	754592	720106	95.4298	7.20106	427413	59.35	48.08	6.67679	18.92	2.62739	424213	58.91	5.46114	5.36203
Double-enriched	UKRC_59	UKP359	22.055	1469098	1407163	95.7841	14.0716	1023549	72.74	60.69	4.31293	42.94	3.05153	1016451	72.23	2.15333	2.12726
Double-enriched	UKRC_60	UKP360	25.275	66584	63684	95.6446	0.63684	18674	29.32	2.74	4.30249	0.69	1.08347	21598	33.91	50.7321	26.1168
Double-enriched	UKRC_61	UKP361	25.1	2939870	2812480	95.6668	28.1248	1945648	69.18	71.85	2.55468	80.89	2.87611	1939098	68.95	2.19182	1.7875
Double-enriched	UKRC_62	UKP362	23.735	974708	928628	95.2724	9.28628	472728	50.91	58.1	6.25654	25.17	2.71045	463462	49.91	2.05661	2.04635
Double-enriched	UKRC_63	UKP363	24.17	2407492	2324484	96.5521	23.2448	1943255	83.6	37.15	1.5982	72.4	3.11467	1913377	82.31	1.83919	51.0645
Double-enriched	UKRC_64	UKP364	25.155	598102	574957	96.1303	5.74957	393084	68.37	42.74	7.4336	15.16	2.63672	395690	68.82	6.54065	5.77957
Double-enriched	UKRC_65	UKH149	28.58	745441	701121	94.0545	7.01121	344498	49.14	48.93	6.97882	13.19	1.88127	404539	57.7	6.03818	2.98788
Double-enriched	UKRC_66	UKP366	23.79	28010207	26722358	95.4022	267.224	17170398	64.25	98.43	0.368343	790.96	2.95992	17117097	64.06	1.94439	1.74835
Double-enriched	UKRC_67	UKP367	23.815	406118	390510	96.1568	3.9051	235194	60.23	39.99	10.2405	10.35	2.65038	233115	59.7	7.28229	6.89307
Double-enriched	UKRC_68	UKP368	24.75	2987032	2816002	94.2742	28.16	1461645	51.9	68.88	2.44602	67.08	2.3821	1527740	54.25	4.20925	2.42072
Double-enriched	UKRC_69	UKP369	23.535	NA	NA	NA	NA	NA	NA	NA	NA	NA	NA	NA	NA	NA	NA
Double-enriched	UKRC_70	UKP370	26.825	23616065	22772638	96.4286	227.726	16431774	72.16	98.67	0.433283	695.27	3.05309	16272034	71.45	1.54169	1.49748
Double-enriched	UKRC_71	UKP371	26.645	291755	278166	95.3423	2.78166	166145	59.73	24.09	8.6603	7.65	2.75016	165230	59.4	8.5568	7.37943
Double-enriched	UKRC_72	UKP372	25.13	2326855	2197402	94.4366	21.974	1276460	58.09	62.07	2.8247	48.99	2.22945	1391835	63.34	4.16573	2.28783
Double-enriched	UKRC_73	UKH150	24.425	223863	214333	95.7429	2.14333	145748	68	19.51	9.10266	5.63	2.62675	154397	72.04	5.17393	4.52123
Double-enriched	UKRC_74	UKP374	23.38	13800157	13254073	96.0429	132.541	8570220	64.66	95.42	0.71993	381.16	2.8758	8489140	64.05	2.19677	1.87396
Double-enriched	UKRC_75	UKP375	27.765	231405	221739	95.8229	2.21739	164754	74.3	25.6	11.5451	6.09	2.74647	166217	74.96	8.85039	8.35076
Double-enriched	UKRC_76	UKP376	22.655	1137639	1084729	95.3491	10.8473	675724	62.29	48.24	4.44719	31.05	2.86247	672209	61.97	7.5446	6.8359
Double-enriched	UKRC_77	UKP377	22.055	241346	216198	89.5801	2.16198	96438	44.61	14.38	6.65131	4.61	2.1323	104585	48.37	12.2059	8.61827
Double-enriched	UKRC_78	UKP378	25.115	NA	NA	NA	NA	NA	NA	NA	NA	NA	NA	NA	NA	NA	NA
Double-enriched	UKRC_79	UKP379	23.68	50571	47504	93.9353	0.47504	21451	45.16	4.29	9.03082	0.92	1.93668	24376	51.31	22.5104	14.2005
Double-enriched	UKRC_80	UKP380	20.13	21918338	21120996	96.3622	211.21	16206631	76.73	85.39	0.40429	657.47	3.11287	16122266	76.33	2.78266	2.74798
Double-enriched	UKRC_81	UKP381	26.03	75124	70756	94.1856	0.70756	15130	21.38	2.2	3.10928	0.59	0.833852	20351	28.76	14.8291	8.8099
Double-enriched	UKRC_82	UKP382	25.565	1676686	1601188	95.4972	16.0119	1379554	86.16	69.38	4.33303	49.86	3.11394	1379167	86.13	6.87296	6.70319
Double-enriched	UKRC_83	UKP383	18.905	4878218	4678933	95.9148	46.7893	3901980	83.39	84.27	1.80105	147.35	3.14922	3882836	82.99	4.07641	3.95549
Double-enriched	UKRC_84	UKP384	20.11	3609521	3459971	95.8568	34.5997	2049094	59.22	81.51	2.3558	102.72	2.96881	2033606	58.78	2.76974	2.5157
Double-enriched	UKRC_85	UKP385	22.09	903444	852158	94.3233	8.52158	597492	70.12	68.61	8.05132	24.79	2.90908	592214	69.5	4.12619	4.03718
Double-enriched	UKRC_86	UKP386	23.45	154880	129377	83.5337	1.29377	71521	55.28	7.25	5.60378	3.43	2.65117	71525	55.28	29.1307	19.8845
Double-enriched	UKRC_87	UKP387	23.92	3975482	3803025	95.662	38.0303	2475366	65.09	59.05	1.55271	115.9	3.04757	2450135	64.43	2.45397	2.42798
Double-enriched	UKRC_88	UKP388	26.475	3241542	3109329	95.9213	31.0933	2355130	75.74	70.88	2.27959	90.73	2.91799	2359910	75.9	2.53387	1.96093
Double-enriched	UKRC_89	UKP389	29.71	887532	853463	96.1614	8.53463	709671	83.15	28.38	3.32528	25.76	3.01829	710918	83.3	11.5415	9.51656
Double-enriched	UKRC_90	UKP390	29.07	44137	42298	95.8334	0.42298	27016	63.87	5.91	13.9723	1.04	2.45875	29253	69.16	17.1747	12.1562
Double-enriched	UKRC_91	UKP391	22.035	5296832	4939351	93.251	49.3935	2464623	49.9	77.25	1.56397	106.68	2.1598	2639576	53.44	4.90147	2.65833
Double-enriched	UKRC_92	UKP392	23.93	2400909	2171198	90.4323	21.712	535410	24.66	87.03	4.00839	17.97	0.827654	539272	24.84	13.9524	6.00184
Double-enriched	UKRC_93	UKP393	22.505	3637146	3501012	96.2571	35.0101	2390972	68.29	75.04	2.14338	104.31	2.97942	2360192	67.41	1.53354	1.531
Double-enriched	UKRC_94	UKP394	25.84	125313	119188	95.1122	1.19188	59278	49.73	8.64	7.24905	2.53	2.1227	60552	50.8	31.5628	24.9995
Double-enriched	UKRC_95	UKP395A	25.16	156584	146172	93.3505	1.46172	117561	80.43	28.59	19.5591	4.36	2.98279	116968	80.02	9.40857	9.31815
Double-enriched	UKRC_96	UKP395B	24.88	NA	NA	NA	NA	NA	NA	NA	NA	NA	NA	NA	NA	NA	NA
Double-enriched	UKRC_97	UKH151	37.81	74002	70828	95.7109	0.70828	2292	3.24	4.04	5.70396	0.11	0.155306	2349	3.32	24.9102	11.0244
Double-enriched	UKRC_98	UKP398	25.575	7085649	6758545	95.3836	67.5854	4311336	63.79	98.01	1.45016	202.3	2.99325	4260230	63.03	1.67832	1.66625
Double-enriched	UKRC_99	UKP399	27.59	1101243	1047337	95.105	10.4734	627050	59.87	75.42	7.20112	30.59	2.92074	619647	59.16	3.21059	3.20017
Double-enriched	UKRC_100	UKP400	28.995	1248957	1180537	94.5218	11.8054	902765	76.47	67.54	5.72113	33.1	2.80381	914511	77.47	5.12921	3.45923
Uneriched		91	average	3.721e+06	3.34141e+06	89.6989	33.4141	1423.51	0.0329137	2.56196	0.060733	0.0503394	0.00114582	3853.44	0.0997916
			sum	338610943	304067905			129539						350663
			min	925841	656325	70.8896	6.56325	11	0.000401738	0.0201595	0.00136684	0.000411082	1.3126e-05	101	0.00628471	0	0
			max	9806244	8845363	93.0101	88.4536	27746	0.431083	48.2899	0.888734	1.119	0.0146647	61618	1.00956	0	0
Single-enriched		91	average	5.29844e+06	4.72589e+06	90.7913	47.2589	941467	15.8512	54.3804	1.79048	32.1178	0.563431	1200014	17.9021	1112.76	382.79
			sum	482158421	430055941			85673469						109201274
			min	504350	462706	75.0361	4.62706	5150	0.130067	1.54497	0.0390193	0.176817	0.00446564	11924	0.301149	45.4082	6.05504
			max	33731557	30900075	94.8685	309.001	15957290	68.8908	99.9991	7.92807	546.968	2.36137	16344542	70.5626	3689.59	1306.07
Double-enriched		91	average	3.60074e+06	3.42667e+06	94.4845	34.2667	2.40697e+06	64.9843	48.0863	5.99301	95.4995	2.70221	2.40001e+06	65.7841	9.23932	7.62949
			sum	327667623	311827039			219033854						218400757
			min	29209	27862	82.6797	0.27862	2292	3.24	2.2	0.163208	0.11	0.155306	2349	3.32	1.28159	1.19112
			max	64217412	61259433	96.5521	612.594	33982587	91.99	99.99	19.5591	1497.9	21.464	33520923	92.39	50.7321	51.0645
