# Supplementary material for: Whole Genome Targeted Enrichment and Sequencing of Human-Infecting Cryptosporidium spp.
Source: Research Square preprint supplement (doi:10.21203/rs.3.rs-4294842/v1), 2024-05-17
Supplement: Supplementary file 7 [file 92f87bd619c6634106a32d46.xlsx]

## Sheet: clinical_samples_iTru_summary_s
Library	fastq_label	Sample	qPCR_Ct	Raw_Paired_Reads	Trim_Paired_Reads	Percentage_Retained	Number_of_hundred_thousand_paired_reads	Mapped_Paired_Reads_Cparvum	Per_Map_Paired_Reads_Cparvum	Depth_Cparvum	Normalized_Depth_Cparvum	Breadth_Cparvum	Normalized_Breadth_Cparvum	Mapped_Paired_Reads_10_genomes	Per_Map_Paired_Reads_10_genomes	Fold_change_Cparvum	Fold_change_10genomes
Enriched	UKRC_01	UKP301	24.525	1572833	1438615	91.4665	14.3862	324591	22.5627	11.7716	0.818257	48.8	3.39215	344557	23.9506	NA	NA		C parvum	7.20305	Ten genomes	12.5715
Enriched	UKRC_02	UKP302	23.86	1367719	1219286	89.1474	12.1929	364885	29.9261	12.1462	0.99617	48.2823	3.95989	365674	29.9908	NA	NA			5097.45		2214.24
Enriched	UKRC_03	UKP303	25.365	1233010	1087934	88.234	10.8793	201974	18.5649	6.69791	0.615654	31.6598	2.91009	209715	19.2764	NA	NA			2095.68		827.873
Enriched	UKRC_04	UKP304	24.865	1204428	1052921	87.4208	10.5292	154492	14.6727	5.00396	0.475246	29.5053	2.80223	164402	15.6139	NA	NA			53
Enriched	UKRC_05	UKP305	28.665	496556	448593	90.3409	4.48593	220343	49.1187	7.01715	1.56426	26.2063	5.84188	232921	51.9226	NA	NA
Enriched	UKRC_06	UKP306	25.655	840653	738791	87.883	7.38791	238422	32.2719	6.5187	0.882347	27.284	3.69306	332560	45.0141	NA	NA
Enriched	UKRC_07	UKP307	21.08	3229135	2972730	92.0596	29.7273	2382992	80.1617	79.3757	2.67013	90.2385	3.03554	2379064	80.0296	NA	NA
Enriched	UKRC_08	UKP308	24.195	1111451	964509	86.7793	9.64509	256923	26.6377	8.2634	0.856747	32.8443	3.40528	296730	30.7649	NA	NA
Enriched	UKRC_09	UKH144	30.36	333012	284567	85.4525	2.84567	7353	2.58393	0.246833	0.0867397	1.514	0.532036	11076	3.89223	NA	NA
Enriched	UKRC_10	UKH145	31.72	413223	323161	78.205	3.23161	31456	9.73385	0.91648	0.283598	3.71166	1.14855	67669	20.9397	7.20305	15.4954
Enriched	UKRC_11	UKP311	28.175	1459499	1229575	84.2464	12.2957	201308	16.3722	6.22967	0.506652	11.8308	0.962189	256731	20.8797	5071.74	648.608
Enriched	UKRC_12	UKP312	25.645	18716331	16420357	87.7328	164.204	11842906	72.1233	403.94	2.46	94.2346	0.573889	11920653	72.5968	120.101	93.4628
Enriched	UKRC_13	UKP313	23.115	1199429	957100	79.7963	9.571	221283	23.1202	4.13722	0.432266	9.24643	0.966089	350769	36.6491	NA	NA
Enriched	UKRC_14	UKP314	23.76	1370506	1139382	83.1359	11.3938	272587	23.9241	7.90369	0.693682	16.6009	1.45701	358391	31.4549	3873.38	949.563
Enriched	UKRC_15	UKP315	25.81	6049518	4770586	78.8589	47.7059	1325527	27.7854	24.9829	0.523686	28.832	0.604369	1971801	41.3325	1067.77	723.43
Enriched	UKRC_16	UKP316	21.2	955349	744462	77.9257	7.44462	278382	37.3937	7.39718	0.993627	10.8702	1.46014	363106	48.7743	NA	NA
Enriched	UKRC_17	UKP317	24.2	2589292	1996783	77.1169	19.9678	194544	9.74287	4.37626	0.219166	12.0062	0.601277	328417	16.4473	1177.14	565.386
Enriched	UKRC_18	UKP318	28.055	741781	632588	85.2796	6.32588	221993	35.0928	7.30106	1.15416	13.8696	2.19252	226833	35.8579	5060.24	1147.19
Enriched	UKRC_19	UKP319	27.69	965347	780461	80.8477	7.80461	118149	15.1384	3.28515	0.420925	9.10389	1.16648	169214	21.6813	4651.83	1139.48
Enriched	UKRC_20	UKP320	22.63	2177652	1918697	88.1085	19.187	995210	51.8691	32.9046	1.71494	77.1713	4.02207	997219	51.9738	NA	NA
Enriched	UKRC_21	UKP321	26.425	2313926	1881299	81.3033	18.813	646005	34.3382	17.1385	0.910993	28.3263	1.50568	825356	43.8716	2341.46	1132.34
Enriched	UKRC_22	UKP322	21.94	9081098	7447047	82.006	74.4705	3710478	49.8248	105.709	1.41947	60.4916	0.81229	4315650	57.9512	886.823	641.454
Enriched	UKRC_23	UKP323	26.755	5238207	4069383	77.6866	40.6938	735885	18.0835	12.7444	0.313177	21.9109	0.538434	1162924	28.5774	1196.61	314.151
Enriched	UKRC_24	UKP324	26.885	112095	94981	84.7326	0.94981	36224	38.1382	1.25361	1.31985	3.39207	3.57132	39153	41.2219	NA	NA
Enriched	UKRC_25	UKP325	27.98	1251165	928551	74.2149	9.28551	196560	21.1685	2.80842	0.302452	9.40005	1.01234	336637	36.254	NA	NA
Enriched	UKRC_26	UKP326	27.56	1369813	914421	66.7552	9.14421	198425	21.6995	3.02488	0.330797	8.42271	0.921098	348504	38.112	NA	NA
Enriched	UKRC_27	UKP327	29.19	1318541	1112967	84.409	11.1297	354967	31.8938	12.0485	1.08255	20.3416	1.82769	376201	33.8016	3622.72	785.706
Enriched	UKRC_28	UKP328	26.125	523427	403513	77.0906	4.03513	77307	19.1585	2.09746	0.5198	5.61929	1.39259	117064	29.0112	24.906	12.5715
Enriched	UKRC_29	UKP329	26.07	688151	610461	88.7103	6.10461	402043	65.8589	13.3485	2.18663	19.2319	3.15039	418367	68.533	NA	NA
Enriched	UKRC_30	UKH146	26.3	857637	733641	85.5421	7.33641	23525	3.20661	0.779727	0.106282	6.79053	0.925593	30307	4.13104	NA	NA
Enriched	UKRC_31	UKP331	23.085	3629010	3170596	87.3681	31.706	1970071	62.1357	66.8103	2.10719	50.859	1.60408	1983800	62.5687	1401.85	898.385
Enriched	UKRC_32	UKP332	31.075	2220349	1837893	82.775	18.3789	885197	48.1637	30.2961	1.64842	25.5409	1.38969	900217	48.9809	618.323	229.295
Enriched	UKRC_33	UKP333	26.17	7059942	6157413	87.2162	61.5741	4119625	66.9051	135.438	2.19959	77.0058	1.25062	4249241	69.0102	1294.14	995.282
Enriched	UKRC_34	UKP334	24.155	176539	137717	78.0094	1.37717	39880	28.9579	1.10766	0.804305	2.7701	2.01145	58314	42.3434	NA	NA
Enriched	UKRC_35	UKP335	24.265	692581	588450	84.9648	5.8845	136286	23.1602	4.57769	0.777923	15.3017	2.60034	148486	25.2334	3039.56	593.744
Enriched	UKRC_36	UKP336	23.31	300006	258018	86.0043	2.58018	106376	41.2281	3.74153	1.4501	7.6537	2.96634	108267	41.961	NA	NA
Enriched	UKRC_37	UKP337	30.085	1223719	1110862	90.7775	11.1086	193227	17.3943	6.50716	0.585776	33.7516	3.03833	199792	17.9853	NA	NA
Enriched	UKRC_38	UKP338	24.38	1150239	1053966	91.6302	10.5397	795652	75.4912	26.807	2.54345	66.0078	6.2628	791075	75.057	NA	NA
Enriched	UKRC_39	UKP339	25.07	29364	24723	84.1949	0.24723	9242	37.3822	0.314631	1.27262	1.67076	6.75791	10872	43.9752	NA	NA
Enriched	UKRC_40	UKP340	24.45	2026746	1746087	86.1522	17.4609	776536	44.4729	25.4102	1.45527	30.3499	1.73817	845166	48.4034	2302.17	1204.86
Enriched	UKRC_41	UKP341	23.32	84754	74581	87.997	0.74581	41917	56.2033	1.45847	1.95556	3.39767	4.55567	41874	56.1457	NA	NA
Enriched	UKRC_42	UKP342	24.95	1284844	1089439	84.7915	10.8944	470432	43.1811	15.3904	1.41269	29.0788	2.66916	504161	46.2771	2317.74	1247.46
Enriched	UKRC_43	UKP343	22.815	26484687	23078867	87.1404	230.789	18401815	79.7345	559.41	2.4239	96.362	0.417533	19159559	83.0178	196.88	190.715
Enriched	UKRC_44	UKH147	26.6	846892	736211	86.9309	7.36211	100542	13.6567	3.54237	0.481162	6.50923	0.884153	107138	14.5526	3014.18	527.026
Enriched	UKRC_45	UKP345	26.725	9371292	6827061	72.8508	68.2706	370509	5.42706	8.84388	0.129541	21.1296	0.309498	545313	7.98752	102.142	19.9491
Enriched	UKRC_46	UKP346	27.155	3603162	2577064	71.5223	25.7706	428228	16.6169	7.2569	0.281596	18.7112	0.726065	722385	28.0313	1769.59	1126.73
Enriched	UKRC_47	UKP347	24.03	5570873	4918086	88.2821	49.1809	2845004	57.8478	82.3306	1.67404	94.0141	1.9116	3192272	64.9088	NA	NA
Enriched	UKRC_48	UKP348	24.775	1675111	1474559	88.0275	14.7456	767229	52.0311	27.2658	1.84908	31.2322	2.11807	779076	52.8345	2927.09	1963.8
Enriched	UKRC_49	UKP349	25.835	662886	603222	90.9994	6.03222	283821	47.0508	9.40383	1.55893	32.765	5.43166	311663	51.6664	NA	NA
Enriched	UKRC_50	UKP350	24.215	15914811	11863454	74.5435	118.635	372190	3.13728	8.31846	0.0701183	18.6508	0.157212	606952	5.11615	78.0173	21.7492
Enriched	UKRC_51	UKP351	28.555	2239834	1787980	79.8265	17.8798	511700	28.6189	11.9997	0.671129	18.0078	1.00716	698283	39.0543	1313.06	685.587
Enriched	UKRC_52	UKP352	26.23	1470483	1196649	81.378	11.9665	232097	19.3956	5.96491	0.498468	14.8312	1.23939	328536	27.4547	2782.67	1617.16
Enriched	UKRC_53	UKP353	28.96	2579529	2267580	87.9067	22.6758	1290823	56.9251	47.522	2.09572	46.9362	2.06988	1291583	56.9587	NA	NA
Enriched	UKRC_54	UKP354	25.32	7780700	5725619	73.5875	57.2562	710166	12.4033	3.95928	0.0691502	12.5204	0.218673	1402312	24.4919	NA	NA
Enriched	UKRC_55	UKH148	27.715	2022502	1807424	89.3657	18.0742	605246	33.4867	18.8253	1.04155	55.6864	3.08098	738831	40.8776	NA	NA
Enriched	UKRC_56	UKP356	26.05	520513	428844	82.3887	4.28844	57083	13.3109	1.80863	0.421745	4.85213	1.13144	73298	17.092	NA	NA
Enriched	UKRC_57	UKP357	24.31	1312770	1207837	92.0067	12.0784	837755	69.3599	27.521	2.27853	66.1144	5.47378	832881	68.9564	NA	NA
Enriched	UKRC_58	UKP358	23.6	775646	661495	85.2831	6.61495	221628	33.5041	7.82865	1.18348	13.8348	2.09145	235919	35.6645	NA	NA
Enriched	UKRC_59	UKP359	22.055	1056707	927058	87.7308	9.27058	514964	55.5482	18.3309	1.97732	25.4508	2.74533	524118	56.5356	1691.19	1166.29
Enriched	UKRC_60	UKP360	25.275	1748592	1461981	83.609	14.6198	146053	9.99008	4.45283	0.304575	11.0488	0.755745	240752	16.4675	4705.71	1414.85
Enriched	UKRC_61	UKP361	25.1	2702353	2404295	88.9704	24.043	1239986	51.5738	37.0757	1.54206	77.0672	3.2054	1468536	61.0797	NA	NA
Enriched	UKRC_62	UKP362	23.735	2818031	2438450	86.5303	24.3845	1380093	56.5971	49.6584	2.03647	47.393	1.94357	1378725	56.541	839.397	559.741
Enriched	UKRC_63	UKP363	24.17	748215	687680	91.9094	6.8768	423537	61.5893	14.245	2.07146	46.5765	6.77299	434450	63.1762	NA	NA
Enriched	UKRC_64	UKP364	25.155	1319878	1104172	83.6571	11.0417	341856	30.9604	10.2466	0.92799	16.6928	1.51179	411101	37.2316	NA	NA
Enriched	UKRC_65	UKH149	28.58	1293527	1125769	87.031	11.2577	127159	11.2953	2.63532	0.234091	17.2529	1.53254	246636	21.9082	NA	NA
Enriched	UKRC_66	UKP366	23.79	2980216	2711123	90.9707	27.1112	1888862	69.6708	63.4222	2.33933	94.7212	3.4938	1957070	72.1867	NA	NA
Enriched	UKRC_67	UKP367	23.815	2562222	2185294	85.289	21.8529	1326700	60.7104	45.2638	2.07129	44.3673	2.03027	1367961	62.5985	1400.46	1162.24
Enriched	UKRC_68	UKP368	24.75	2439042	1621872	66.4963	16.2187	288721	17.8017	2.28179	0.140689	7.71788	0.475862	575670	35.4942	NA	NA
Enriched	UKRC_69	UKP369	23.535	8063879	6122800	75.9287	61.228	1232856	20.1355	17.0258	0.278073	26.899	0.439326	2142142	34.9863	1790.75	1280.46
Enriched	UKRC_70	UKP370	26.825	324820	277216	85.3445	2.77216	180359	65.0608	6.46994	2.3339	11.9082	4.29565	191482	69.0732	NA	NA
Enriched	UKRC_71	UKP371	26.645	245515	201541	82.0891	2.01541	46711	23.1769	1.6477	0.817553	5.74921	2.85263	57127	28.3451	NA	NA
Enriched	UKRC_72	UKP372	25.13	3118852	2832062	90.8046	28.3206	2075858	73.2985	70.1515	2.47705	95.7153	3.3797	2106112	74.3667	NA	NA
Enriched	UKRC_73	UKH150	24.425	2211122	1795612	81.2082	17.9561	644215	35.8772	20.7692	1.15666	32.9464	1.83483	779268	43.3985	1846	1318.51
Enriched	UKRC_74	UKP374	23.38	2069887	1652202	79.8209	16.522	673362	40.7554	17.6515	1.06836	69.7585	4.22216	884725	53.5482	NA	NA
Enriched	UKRC_75	UKP375	27.765	682465	570802	83.6383	5.70802	206768	36.2241	7.11866	1.24713	15.5347	2.72156	238004	41.6964	3469.75	2214.24
Enriched	UKRC_76	UKP376	22.655	1882529	1472696	78.2297	14.727	399299	27.1135	11.6167	0.788804	18.5364	1.25867	506727	34.4081	947.614	309.649
Enriched	UKRC_77	UKP377	22.055	2806053	2144179	76.4126	21.4418	537532	25.0694	7.76548	0.362166	18.4186	0.859006	884360	41.2447	873.594	776.645
Enriched	UKRC_78	UKP378	25.115	2268782	1747880	77.0405	17.4788	240493	13.7591	2.38279	0.136325	7.72034	0.441698	478305	27.3649	2101.32	1081.6
Enriched	UKRC_79	UKP379	23.68	969515	750980	77.4593	7.5098	117219	15.6088	2.85173	0.379734	7.34541	0.97811	186173	24.7907	1598.88	684.528
Enriched	UKRC_80	UKP380	20.13	589082	518168	87.9619	5.18168	338038	65.2371	12.4675	2.40608	18.7943	3.62707	339476	65.5147	NA	NA
Enriched	UKRC_81	UKP381	26.03	5931233	4409574	74.345	44.0957	613764	13.9189	5.70509	0.12938	16.4917	0.373997	1209993	27.4401	1160.54	604.391
Enriched	UKRC_82	UKP382	25.565	875170	769372	87.9111	7.69372	315512	41.009	10.5399	1.36993	16.5524	2.15141	331264	43.0564	3308.58	1289.95
Enriched	UKRC_83	UKP383	18.905	2990971	2506569	83.8045	25.0657	1237990	49.3898	41.3712	1.65051	45.7003	1.82322	1327644	52.9666	758.505	375.056
Enriched	UKRC_84	UKP384	20.11	843556	760999	90.2132	7.60999	359270	47.2103	12.3963	1.62895	58.1703	7.64395	398712	52.3932	NA	NA
Enriched	UKRC_85	UKP385	22.09	4236060	3716057	87.7244	37.1606	2373913	63.8826	81.2095	2.18537	60.488	1.62775	2398189	64.5359	1076.91	594.582
Enriched	UKRC_86	UKP386	23.45	1012035	849096	83.8999	8.49096	155951	18.3667	5.17616	0.609609	12.8312	1.51116	215680	25.4011	5097.45	1270.16
Enriched	UKRC_87	UKP387	23.92	3439679	3148287	91.5285	31.4829	1919966	60.9845	69.1492	2.19641	87.7635	2.78766	1918165	60.9273	NA	NA
Enriched	UKRC_88	UKP388	26.475	2052065	1760063	85.7703	17.6006	741193	42.1117	20.9084	1.18793	73.3134	4.16539	937762	53.28	NA	NA
Enriched	UKRC_89	UKP389	29.71	677699	584221	86.2066	5.84221	186831	31.9795	6.21918	1.06453	11.3907	1.94972	226273	38.7307	3491.59	1437.11
Enriched	UKRC_90	UKP390	29.07	661445	545267	82.4357	5.45267	107858	19.7808	3.28909	0.603206	10.6477	1.95275	150020	27.5131	3246.82	1800.65
Enriched	UKRC_91	UKP391	22.035	3446694	2716524	78.8154	27.1652	792868	29.1869	15.9271	0.586304	64.7527	2.38366	1258498	46.3275	NA	NA
Enriched	UKRC_92	UKP392	23.93	4830703	3543282	73.3492	35.4328	171716	4.84624	4.38245	0.123683	15.1662	0.428026	276458	7.80231	1280.09	52.8437
Enriched	UKRC_93	UKP393	22.505	1307947	1190885	91.0499	11.9088	863231	72.4865	29.7471	2.4979	81.6441	6.85575	859064	72.1366	NA	NA
Enriched	UKRC_94	UKP394	25.84	1656710	1352687	81.649	13.5269	268707	19.8647	8.65235	0.639642	17.5718	1.29903	311655	23.0397	2487.22	593.786
Enriched	UKRC_95	UKP395A	25.16	1784152	1540639	86.3513	15.4064	536321	34.8116	18.7353	1.21608	22.8609	1.48386	536767	34.8405	4710.14	897.603
Enriched	UKRC_96	UKP395B	24.88	709519	604727	85.2306	6.04727	29621	4.89824	0.835012	0.138081	4.94291	0.817378	84551	13.9817	4235.09	577.065
Enriched	UKRC_97	UKH151	37.81	317391	270597	85.2567	2.70597	5072	1.87437	0.18766	0.0693503	2.00172	0.739741	7380	2.7273	2533.04	113.33
Enriched	UKRC_98	UKP398	25.575	2763502	2433411	88.0553	24.3341	1859182	76.4023	65.7635	2.70252	50.22	2.06377	1862957	76.5574	618.813	411.557
Enriched	UKRC_99	UKP399	27.59	1059424	933403	88.1048	9.33403	548781	58.7936	18.9999	2.03556	21.6943	2.32422	549041	58.8214	2435.69	1259.06
Enriched	UKRC_100	UKP400	28.995	1331962	1079788	81.0675	10.7979	146536	13.5708	4.67631	0.433077	35.2541	3.26491	445423	41.251	1106.3	1140.82
Unenriched	UKRC_01	UKP301	24.525	NA	NA	NA	NA	0	0	NA	NA	NA	NA	NA	NA	NA	NA
Unenriched	UKRC_02	UKP302	23.86	NA	NA	NA	NA	0	0	NA	NA	NA	NA	NA	NA	NA	NA
Unenriched	UKRC_03	UKP303	25.365	NA	NA	NA	NA	0	0	NA	NA	NA	NA	NA	NA	NA	NA
Unenriched	UKRC_04	UKP304	24.865	NA	NA	NA	NA	0	0	NA	NA	NA	NA	NA	NA	NA	NA
Unenriched	UKRC_05	UKP305	28.665	NA	NA	NA	NA	0	0	NA	NA	NA	NA	NA	NA	NA	NA
Unenriched	UKRC_06	UKP306	25.655	NA	NA	NA	NA	0	0	NA	NA	NA	NA	NA	NA	NA	NA
Unenriched	UKRC_07	UKP307	21.08	NA	NA	NA	NA	0	0	NA	NA	NA	NA	NA	NA	NA	NA
Unenriched	UKRC_08	UKP308	24.195	NA	NA	NA	NA	0	0	NA	NA	NA	NA	NA	NA	NA	NA
Unenriched	UKRC_09	UKH144	30.36	544	107	19.6691	0.00107	0	0	0	0	0	0	0	0	NA	NA
Unenriched	UKRC_10	UKH145	31.72	656	148	22.561	0.00148	2	1.35135	0	0	4.31e-05	0.0291216	2	1.35135	NA	NA
Unenriched	UKRC_11	UKP311	28.175	2836360	2230402	78.6361	22.304	72	0.00322812	0	0	0.000997011	4.4701e-05	718	0.0321915	NA	NA
Unenriched	UKRC_12	UKP312	25.645	6456426	5461250	84.5863	54.6125	32796	0.600522	1.01	0.0184939	0.483487	0.00885304	42420	0.776745	NA	NA
Unenriched	UKRC_13	UKP313	23.115	318	105	33.0189	0.00105	0	0	0	0	0	0	0	0	NA	NA
Unenriched	UKRC_14	UKP314	23.76	7978994	5796121	72.6423	57.9612	358	0.00617654	0.01	0.000172529	0.00570692	9.8461e-05	1920	0.0331256	NA	NA
Unenriched	UKRC_15	UKP315	25.81	6479646	4911258	75.7952	49.1126	1278	0.0260218	0.04	0.000814455	0.0198774	0.000404732	2806	0.057134	NA	NA
Unenriched	UKRC_16	UKP316	21.2	363	103	28.3747	0.00103	0	0	0	0	0	0	0	0	NA	NA
Unenriched	UKRC_17	UKP317	24.2	5160965	4107885	79.5953	41.0789	340	0.00827677	0.01	0.000243434	0.00461563	0.00011236	1195	0.0290904	NA	NA
Unenriched	UKRC_18	UKP318	28.055	2731481	2018741	73.9065	20.1874	140	0.00693502	0	0	0.00201858	9.99919e-05	631	0.0312571	NA	NA
Unenriched	UKRC_19	UKP319	27.69	7911636	6422306	81.1754	64.2231	209	0.00325428	0.01	0.000155707	0.00259004	4.03288e-05	1222	0.0190274	NA	NA
Unenriched	UKRC_20	UKP320	22.63	0	0	NA	NA	0	0	NA	NA	NA	NA	NA	NA	NA	NA
Unenriched	UKRC_21	UKP321	26.425	4995609	4036730	80.8056	40.3673	592	0.0146653	0.02	0.000495451	0.0122895	0.000304442	1564	0.0387442	NA	NA
Unenriched	UKRC_22	UKP322	21.94	2840495	2134078	75.1305	21.3408	1199	0.0561835	0.03	0.00140576	0.0165065	0.000773474	1928	0.0903435	NA	NA
Unenriched	UKRC_23	UKP323	26.755	5237272	4082798	77.9566	40.828	617	0.0151122	0.02	0.00048986	0.00928256	0.000227358	3714	0.090967	NA	NA
Unenriched	UKRC_24	UKP324	26.885	307	79	25.7329	0.00079	0	0	0	0	0	0	0	0	NA	NA
Unenriched	UKRC_25	UKP325	27.98	299	78	26.087	0.00078	0	0	0	0	0	0	0	0	NA	NA
Unenriched	UKRC_26	UKP326	27.56	300	101	33.6667	0.00101	0	0	0	0	0	0	0	0	NA	NA
Unenriched	UKRC_27	UKP327	29.19	7090934	5508977	77.6904	55.0898	485	0.00880381	0.01	0.000181522	0.00669637	0.000121554	2370	0.0430207	NA	NA
Unenriched	UKRC_28	UKP328	26.125	699	130	18.598	0.0013	1	0.769231	0	0	1.05e-05	0.00807692	3	2.30769	NA	NA
Unenriched	UKRC_29	UKP329	26.07	4	2	50	2e-05	0	0	0	0	0	0	0	0	NA	NA
Unenriched	UKRC_30	UKH146	26.3	0	0	NA	NA	0	0	NA	NA	NA	NA	NA	NA	NA	NA
Unenriched	UKRC_31	UKP331	23.085	5925706	4525761	76.3751	45.2576	2006	0.044324	0.05	0.00110479	0.0436257	0.000963941	3152	0.0696457	NA	NA
Unenriched	UKRC_32	UKP332	31.075	1353467	1096361	81.0039	10.9636	854	0.0778941	0.02	0.00182422	0.01306	0.00119122	2342	0.213616	NA	NA
Unenriched	UKRC_33	UKP333	26.17	5278530	4025250	76.257	40.2525	2081	0.0516987	0.06	0.00149059	0.0375113	0.0009319	2791	0.0693373	NA	NA
Unenriched	UKRC_34	UKP334	24.155	12	3	25	3e-05	0	0	0	0	0	0	0	0	NA	NA
Unenriched	UKRC_35	UKP335	24.265	6296588	4567186	72.5343	45.6719	348	0.00761957	0.01	0.000218953	0.00870047	0.0001905	1941	0.0424988	NA	NA
Unenriched	UKRC_36	UKP336	23.31	8	4	50	4e-05	0	0	0	0	0	0	0	0	NA	NA
Unenriched	UKRC_37	UKP337	30.085	0	0	NA	NA	0	0	NA	NA	NA	NA	NA	NA	NA	NA
Unenriched	UKRC_38	UKP338	24.38	0	0	NA	NA	0	0	NA	NA	NA	NA	NA	NA	NA	NA
Unenriched	UKRC_39	UKP339	25.07	12	2	16.6667	2e-05	0	0	0	0	0	0	0	0	NA	NA
Unenriched	UKRC_40	UKP340	24.45	5337746	4161962	77.9723	41.6196	804	0.0193178	0.02	0.000480543	0.0153433	0.000368656	1672	0.0401734	NA	NA
Unenriched	UKRC_41	UKP341	23.32	5	0	0	0	0	0	0	NA	0	NA	0	0	NA	NA
Unenriched	UKRC_42	UKP342	24.95	4917179	3655261	74.3365	36.5526	681	0.0186307	0.02	0.000547157	0.0197985	0.000541644	1356	0.0370972	NA	NA
Unenriched	UKRC_43	UKP343	22.815	6332836	5005306	79.0374	50.0531	20271	0.40499	0.56	0.0111881	0.292246	0.00583873	21788	0.435298	NA	NA
Unenriched	UKRC_44	UKH147	26.6	4637174	3972803	85.6729	39.728	180	0.00453081	0.01	0.000251711	0.00305637	7.69323e-05	1097	0.0276127	NA	NA
Unenriched	UKRC_45	UKP345	26.725	8117539	5047758	62.1834	50.4776	2682	0.0531325	0.07	0.00138675	0.0127415	0.000252418	20211	0.400396	NA	NA
Unenriched	UKRC_46	UKP346	27.155	4242750	2672983	63.0012	26.7298	251	0.00939026	0.01	0.000374114	0.00366302	0.000137039	665	0.0248786	NA	NA
Unenriched	UKRC_47	UKP347	24.03	0	0	NA	NA	0	0	NA	NA	NA	NA	NA	NA	NA	NA
Unenriched	UKRC_48	UKP348	24.775	6389970	5192489	81.26	51.9249	923	0.0177757	0.03	0.000577758	0.0174685	0.000336418	1397	0.0269042	NA	NA
Unenriched	UKRC_49	UKP349	25.835	0	0	NA	NA	0	0	NA	NA	NA	NA	NA	NA	NA	NA
Unenriched	UKRC_50	UKP350	24.215	9132581	6918225	75.7532	69.1822	2782	0.0402126	0.09	0.00130091	0.0107096	0.000154803	16274	0.235234	NA	NA
Unenriched	UKRC_51	UKP351	28.555	10566597	8097989	76.6376	80.9799	1765	0.0217955	0.05	0.000617437	0.0281002	0.000347002	4613	0.0569648	NA	NA
Unenriched	UKRC_52	UKP352	26.23	8769307	6915219	78.8571	69.1522	482	0.00697013	0.01	0.000144609	0.0168004	0.000242949	1174	0.016977	NA	NA
Unenriched	UKRC_53	UKP353	28.96	9	3	33.3333	3e-05	0	0	0	0	0	0	0	0	NA	NA
Unenriched	UKRC_54	UKP354	25.32	3	1	33.3333	1e-05	0	0	0	0	0	0	0	0	NA	NA
Unenriched	UKRC_55	UKH148	27.715	0	0	NA	NA	0	0	NA	NA	NA	NA	NA	NA	NA	NA
Unenriched	UKRC_56	UKP356	26.05	20	6	30	6e-05	0	0	0	0	0	0	0	0	NA	NA
Unenriched	UKRC_57	UKP357	24.31	0	0	NA	NA	0	0	NA	NA	NA	NA	NA	NA	NA	NA
Unenriched	UKRC_58	UKP358	23.6	8	3	37.5	3e-05	0	0	0	0	0	0	0	0	NA	NA
Unenriched	UKRC_59	UKP359	22.055	6998729	5668946	80.9997	56.6895	1862	0.0328456	0.05	0.000881998	0.0457669	0.000807327	2748	0.0484746	NA	NA
Unenriched	UKRC_60	UKP360	25.275	6990660	5369840	76.8145	53.6984	114	0.00212297	0	0	0.00141358	2.63243e-05	625	0.0116391	NA	NA
Unenriched	UKRC_61	UKP361	25.1	0	0	NA	NA	0	0	NA	NA	NA	NA	NA	NA	NA	NA
Unenriched	UKRC_62	UKP362	23.735	6384054	5153803	80.7293	51.538	3475	0.0674259	0.1	0.00194031	0.0810611	0.00157284	5206	0.101013	NA	NA
Unenriched	UKRC_63	UKP363	24.17	0	0	NA	NA	0	0	NA	NA	NA	NA	NA	NA	NA	NA
Unenriched	UKRC_64	UKP364	25.155	1	0	0	0	0	0	0	NA	0	NA	0	0	NA	NA
Unenriched	UKRC_65	UKH149	28.58	0	0	NA	NA	0	0	NA	NA	NA	NA	NA	NA	NA	NA
Unenriched	UKRC_66	UKP366	23.79	0	0	NA	NA	0	0	NA	NA	NA	NA	NA	NA	NA	NA
Unenriched	UKRC_67	UKP367	23.815	5397303	4272162	79.1536	42.7216	1852	0.0433504	0.05	0.00117037	0.0499087	0.00116823	2301	0.0538603	NA	NA
Unenriched	UKRC_68	UKP368	24.75	13	2	15.3846	2e-05	0	0	0	0	0	0	0	0	NA	NA
Unenriched	UKRC_69	UKP369	23.535	7812094	5336110	68.3058	53.3611	600	0.0112441	0.02	0.000374805	0.0106846	0.000200233	1458	0.0273233	NA	NA
Unenriched	UKRC_70	UKP370	26.825	14	5	35.7143	5e-05	0	0	0	0	0	0	0	0	NA	NA
Unenriched	UKRC_71	UKP371	26.645	8	1	12.5	1e-05	0	0	0	0	0	0	0	0	NA	NA
Unenriched	UKRC_72	UKP372	25.13	0	0	NA	NA	0	0	NA	NA	NA	NA	NA	NA	NA	NA
Unenriched	UKRC_73	UKH150	24.425	8000577	5608423	70.1002	56.0842	1090	0.0194351	0.03	0.00053491	0.0172234	0.000307098	1846	0.0329148	NA	NA
Unenriched	UKRC_74	UKP374	23.38	0	0	NA	NA	0	0	NA	NA	NA	NA	NA	NA	NA	NA
Unenriched	UKRC_75	UKP375	27.765	7704696	6149429	79.814	61.4943	642	0.01044	0.02	0.000325233	0.0169208	0.000275161	1158	0.018831	NA	NA
Unenriched	UKRC_76	UKP376	22.655	3920367	2733086	69.7151	27.3309	782	0.0286123	0.02	0.000731774	0.0157234	0.000575298	3037	0.11112	NA	NA
Unenriched	UKRC_77	UKP377	22.055	7607263	5247969	68.9863	52.4797	1506	0.0286968	0.04	0.0007622	0.0233999	0.000445885	2787	0.0531063	NA	NA
Unenriched	UKRC_78	UKP378	25.115	5757366	4826009	83.8232	48.2601	316	0.00654785	0.01	0.000207211	0.00241738	5.00907e-05	1221	0.0253004	NA	NA
Unenriched	UKRC_79	UKP379	23.68	7063174	5152460	72.9482	51.5246	503	0.00976233	0.01	0.000194082	0.011531	0.000223796	1866	0.0362157	NA	NA
Unenriched	UKRC_80	UKP380	20.13	420	84	20	0.00084	0	0	0	0	0	0	0	0	NA	NA
Unenriched	UKRC_81	UKP381	26.03	3797514	2876568	75.7487	28.7657	345	0.0119935	0.01	0.000347636	0.00251944	8.7585e-05	1306	0.0454013	NA	NA
Unenriched	UKRC_82	UKP382	25.565	6003376	4913368	81.8434	49.1337	609	0.0123948	0.02	0.000407053	0.0113168	0.000230327	1640	0.0333783	NA	NA
Unenriched	UKRC_83	UKP383	18.905	7067884	4948193	70.0095	49.4819	3222	0.0651147	0.09	0.00181885	0.0528526	0.00106812	6988	0.141223	NA	NA
Unenriched	UKRC_84	UKP384	20.11	0	0	NA	NA	0	0	NA	NA	NA	NA	NA	NA	NA	NA
Unenriched	UKRC_85	UKP385	22.09	9970765	8325968	83.5038	83.2597	4939	0.0593204	0.14	0.00168149	0.108477	0.00130287	9037	0.10854	NA	NA
Unenriched	UKRC_86	UKP386	23.45	5756781	4690380	81.4757	46.9038	169	0.00360312	0	0	0.00508832	0.000108484	938	0.0199984	NA	NA
Unenriched	UKRC_87	UKP387	23.92	0	0	NA	NA	0	0	NA	NA	NA	NA	NA	NA	NA	NA
Unenriched	UKRC_88	UKP388	26.475	0	0	NA	NA	0	0	NA	NA	NA	NA	NA	NA	NA	NA
Unenriched	UKRC_89	UKP389	29.71	6641556	5317163	80.059	53.1716	487	0.00915902	0.01	0.00018807	0.00702666	0.00013215	1433	0.0269505	NA	NA
Unenriched	UKRC_90	UKP390	29.07	6849018	5137597	75.0122	51.376	313	0.00609234	0.01	0.000194644	0.00438466	8.53445e-05	785	0.0152795	NA	NA
Unenriched	UKRC_91	UKP391	22.035	0	0	NA	NA	0	0	NA	NA	NA	NA	NA	NA	NA	NA
Unenriched	UKRC_92	UKP392	23.93	37820	26414	69.8414	0.26414	1	0.00378587	0	0	1.03e-05	3.89945e-05	39	0.147649	NA	NA
Unenriched	UKRC_93	UKP393	22.505	0	0	NA	NA	0	0	NA	NA	NA	NA	NA	NA	NA	NA
Unenriched	UKRC_94	UKP394	25.84	4512337	3267930	72.4221	32.6793	261	0.00798671	0.01	0.000306004	0.00470859	0.000144085	1268	0.0388013	NA	NA
Unenriched	UKRC_95	UKP395A	25.16	6686296	5533928	82.7652	55.3393	409	0.00739077	0.01	0.000180703	0.00648501	0.000117186	2148	0.0388151	NA	NA
Unenriched	UKRC_96	UKP395B	24.88	4015723	3371998	83.9699	33.72	39	0.00115658	0	0	0.000371947	1.10305e-05	817	0.024229	NA	NA
Unenriched	UKRC_97	UKH151	37.81	3903569	3108230	79.6253	31.0823	23	0.000739971	0	0	0.000227685	7.32523e-06	748	0.0240651	NA	NA
Unenriched	UKRC_98	UKP398	25.575	1083575	853677	78.7834	8.53677	1054	0.123466	0.03	0.00351421	0.0181235	0.00212299	1588	0.186019	NA	NA
Unenriched	UKRC_99	UKP399	27.59	4958950	3786506	76.357	37.8651	914	0.0241383	0.03	0.000792287	0.0189738	0.00050109	1769	0.0467185	NA	NA
Unenriched	UKRC_100	UKP400	28.995	5822560	4834190	83.0252	48.3419	593	0.0122668	0.02	0.00041372	0.00939887	0.000194425	1748	0.0361591	NA	NA
Uneriched		73	average	3.23658e+06	2.48996e+06	61.5312	31.3803	1003.19	0.0425714	0.039726	0.000858139	0.0220954	0.00100926	2705.08	0.110279	#DIV/0!	#DIV/0!	53
			sum	297765818	229076413	4491.77	2290.76	100319	4.25714	2.9	0.0609279	1.61296	0.0716574	197471	8.05035	0	0
			min	0	0	0	0	0	0	0	0	0	0	0	0	0	0
			max	10566597	8325968	85.6729	83.2597	32796	1.35135	1.01	0.0184939	0.483487	0.0291216	42420	2.30769	0	0
Single-enriched		100	average	2.6032e+06	2.15198e+06	83.8731	21.5198	914219	35.6177	28.1043	1.11966	31.3036	2.24522	1.02889e+06	41.228	2095.68	827.873
			sum	260319769	215198339			91421940						102889347
			min	29364	24723	66.4963	0.24723	5072	1.87437	0.18766	0.0691502	1.514	0.157212	7380	2.7273	7.20305	12.5715
			max	26484687	23078867	92.0596	230.789	18401815	80.1617	559.41	2.70252	96.362	7.64395	19159559	83.0178	5097.45	2214.24
			25.4042	2.9067e+06
