# Supplementary material for: Whole Genome Targeted Enrichment and Sequencing of Human-Infecting Cryptosporidium spp.
Source: Research Square preprint supplement (doi:10.21203/rs.3.rs-4294842/v1), 2024-05-17
Supplement: Supplementary file 8 [file e6017c5c6d87ab3cafa2229a.xlsx]

## Sheet: Sheet1
Cost calculation for deep sequencing vs. enrichment
These are the costs if the sample is pure (i.e., 100% crypto)
Genome Size		10000000	organism is ~ crypto															using whole numbers of samples to get close to 20x coverage; adjust this number to achieve whatever coverage target you want
Platform	Instrument	Kit	Price updated	Run Cost	Unit	Read Size(s)	Insert size ≥	Clusters (Millions)	$/M clusters	Reads/ Cluster	Total # Reads (Millions)	cost per M reads	good length	MegaBases (Mb)	cost per Gb	genome size (Mb)	Total x coverage	# of samples	X coverage per sample	Millions of reads per sample	$/sample		Notes
Illumina	iSeq	300 cycles	Jan 2024	869	run	PE150	300	2	434.5	2	4	217.25	140	560	1551.79	10	56	2	28	2	434.5		Reagent+$150; Illumina "up to" spec; achievable on a good run
Illumina	MiSeq	Nano v2 300 cycles	Jan 2024	509	run	PE150	300	1	509	2	2	254.5	150	300	1696.67	10	30	1	30	2	509		Reagent+$150; Illumina "up to" spec; achievable on a good run
Illumina	MiSeq	v3 600 cycles	Jan 2024	2037	run	PE300	600	25	81.48	2	50	40.74	260	13000	156.692	10	1300	65	20	1	31.3385		Reagent+$150; Illumina "up to" spec; achievable on a good run
Illumina	NextSeq 2000	P1 300 cycles	Jan 2024	1540	run	PE150	300	100	15.4	2	200	7.7	140	28000	55	10	2800	140	20	1	11		core lab; Illumina "up to" spec; achievable on good runs
Illumina	NextSeq 2000	P3 300 cycles	Jan 2024	5859	run	PE150	400	1200	4.8825	2	2400	2.44	140	336000	17.4375	10	33600	1680	20	1	3.4875		core lab; Illumina "up to" spec; achievable on good runs
Illumina	NovaSeq 6000	NovaSeq S4	Jan 2024	4500	lane	PE150	300	2500	1.8	2	5000	0.9	140	700000	6.42857	10	70000	3504	20	1	1.28425		core lab average cost; Illumina "up to" spec; achievable on best runs
Illumina	NovaSeq X (+)	1.5 B 300 cycles	April 2024	1500	lane	PE150	300	800	1.875	2	1600	0.94	150	240000	6.25	10	24000	1200	20	1	1.25		Anticipated commercial all-in price with Illumina run yield spec
Illumina	NovaSeq X (+)	10 B 300 cycles	Jan 2024	1824	lane	PE150	300	1250	1.4592	2	2500	0.73	150	375000	4.864	10	37500	1872	20	1	0.974359		Commercial all-in price with volume discount; Illumina run yield spec
Illumina	NovaSeq X (+)	25 B 300 cycles	Jan 2024	3050	lane	PE150	300	3125	0.976	2	6250	0.49	150	937500	3.25333	10	93750	4680	20	1	0.651709		Commercial all-in price with major volume discount; Illumina run yield spec
	Target % of reads	0.001	This is the average for unenriched reads
Effective Genome Size		10000000000	organism is ~ crypto															using whole numbers of samples to get close to 20x coverage; adjust this number to achieve whatever coverage target you want
Platform	Instrument	Kit	Price updated	Run Cost	Unit	Read Size(s)	Insert size ≥	Clusters (Millions)	$/M clusters	Reads/ Cluster	Total # Reads (Millions)	cost per M reads	good length	MegaBases (Mb)	cost per Gb	genome size (Mb)	Total x coverage	# of samples	X coverage per sample	Millions of reads per sample	$/sample		Notes
Illumina	NextSeq 2000	P3 300 cycles	Jan 2024	5859	run	PE150	400	1200	4.8825	2	2400	2.44	140	336000	17.4375	10000	33.6	2	16.8	1200	2929.5		core lab; Illumina "up to" spec; achievable on good runs
Illumina	NovaSeq 6000	NovaSeq S4	Jan 2024	4500	lane	PE150	300	2500	1.8	2	5000	0.9	140	700000	6.42857	10000	70	3	23.3	1667	1500		core lab average cost; Illumina "up to" spec; achievable on best runs
Illumina	NovaSeq X (+)	1.5 B 300 cycles	April 2024	1500	lane	PE150	300	800	1.875	2	1600	0.94	150	240000	6.25	10000	24	1	24	1600	1500		Anticipated commercial all-in price with Illumina run yield spec
Illumina	NovaSeq X (+)	10 B 300 cycles	Jan 2024	1824	lane	PE150	300	1250	1.4592	2	2500	0.73	150	375000	4.864	10000	37.5	2	18.8	1250	912		Commercial all-in price with volume discount; Illumina run yield spec
Illumina	NovaSeq X (+)	25 B 300 cycles	Jan 2024	3050	lane	PE150	300	3125	0.976	2	6250	0.49	150	937500	3.25333	10000	93.8	4	23.5	1563	762.5		Commercial all-in price with major volume discount; Illumina run yield spec
	Target % of reads	0.1	This is a ballpark number for enriched reads; we should replace with the actual numbers
Effective Genome Size		100000000	organism is ~ crypto															calculated number of samples to get 20x coverage
Platform	Instrument	Kit	Price updated	Run Cost	Unit	Read Size(s)	Insert size ≥	Clusters (Millions)	$/M clusters	Reads/ Cluster	Total # Reads (Millions)	cost per M reads	good length	MegaBases (Mb)	cost per Gb	genome size (Mb)	Total x coverage	# of samples	X coverage per sample	Millions of reads per sample	$/sample for sequencing		Notes
Illumina	NextSeq 2000	P3 300 cycles	Jan 2024	5859	run	PE150	400	1200	4.8825	2	2400	2.44	140	336000	17.4375	100	3360	168	20	14	34.875		core lab; Illumina "up to" spec; achievable on good runs
Illumina	NovaSeq 6000	NovaSeq S4	Jan 2024	4500	lane	PE150	300	2500	1.8	2	5000	0.9	140	700000	6.42857	100	7000	350	20	14	12.8571		core lab average cost; Illumina "up to" spec; achievable on best runs
Illumina	NovaSeq X (+)	1.5 B 300 cycles	April 2024	1500	lane	PE150	300	800	1.875	2	1600	0.94	150	240000	6.25	100	2400	120	20	13	12.5		Anticipated commercial all-in price with Illumina run yield spec
Illumina	NovaSeq X (+)	10 B 300 cycles	Jan 2024	1824	lane	PE150	300	1250	1.4592	2	2500	0.73	150	375000	4.864	100	3750	187.5	20	13	9.728		Commercial all-in price with volume discount; Illumina run yield spec
Illumina	NovaSeq X (+)	25 B 300 cycles	Jan 2024	3050	lane	PE150	300	3125	0.976	2	6250	0.49	150	937500	3.25333	100	9375	468.75	20	13	6.50667		Commercial all-in price with major volume discount; Illumina run yield spec
Cost of Enrichment
	Kit (buy-in) cost	# of rxns	dilution	total reactions	bait cost/rxn	other cost/rxn	total cost/rxn	# samples per pool	cost/sample					Enrichment cost	Sequencing cost	total cost
Custom Synthesis of CryptoCap_100K (non-Arbor)
1st enrichment	18000	96	4	384	46.875	10	56.875	8	7.10938			Pure Crypto DNA		0	1	1
2nd enrichment	18000	96	4	384	46.875	10	56.875	48	1.1849			Fecal with 0.1% Crypto		0	1000	1000
Total cost for double enrichments									8.29427			Fecal with 0.1% Crypto		10	10	20
Arbor catalog #308508.V5, 8 rxn
1st enrichment	1500	8	4	32	46.875	10	56.875	8	7.10938
2nd enrichment	1500	8	4	32	46.875	10	56.875	48	1.1849
Total cost for double enrichments									8.29427
Arbor catalog #308548.V5, 48 rxn
1st enrichment	5000	48	4	192	26.0417	10	36.0417	8	4.50521
2nd enrichment	5000	48	4	192	26.0417	10	36.0417	48	0.750868
Total cost for double enrichments									5.25608
Arbor catalog #308596.V5, 96 rxn
1st enrichment	7500	96	4	384	19.5312	10	29.5312	8	3.69141
2nd enrichment	7500	96	4	384	19.5312	10	29.5312	48	0.615234
Total cost for double enrichments									4.30664
