# Supplementary material for: Whole Genome Targeted Enrichment and Sequencing of Human-Infecting Cryptosporidium spp.
Source: Research Square preprint supplement (doi:10.21203/rs.3.rs-4294842/v1), 2024-05-17
Supplement: Supplementary file 9 [file eef5b4abe2ac2855b6411f54.xlsx]

## Sheet: Counts
Sample	Label	Bait_Dilution	Category	Start_Cparvum_DNA_ng	Paired_Raw_Reads	Paired_Trim_Reads	Number_of_hundred_thousand_paired_reads	Paired_Reads_Mapped_to_Cparvum	Per_Mapped_Cparvum	Depth_Cparvum	Normalized_Depth_Cparvum	Breadth_Cparvum	Normalized_Breadth	Paired_reads_mapped_to_10_genomes	Per_Mapped_10_genomes	Fold_Change
S_A_F1	E9_D1_R1	01_Full	A	1	5985226	5693055	56.9305	5549202	97.4732	169.24	2.97274	99.83	1.75354	5557111	97.6121	46.785
S_B_F2	E9_D2_R1	01_Full	B	0.1	1679016	1588492	15.8849	1358840	85.5428	41.18	2.5924	98.17	6.18008	1360713	85.6607	383.24
S_C_F3	E9_D3_R1	01_Full	C	0.01	441371	401626	4.01626	154077	38.3633	4.64	1.1553	72.4	18.0267	154326	38.4253	1082.27
S_D_F4	E9_D4_R1	01_Full	D	0.001	273752	242799	2.42799	18873	7.7731	0.54	0.222406	18.36	7.56181	18928	7.79575	535.199
S_E_F5	E9_D5_R1	01_Full	E	0.0001	382593	339125	3.39125	7434	2.19211	0.18	0.0530778	3.56	1.04976	7478	2.20509	151.329
S_F_F6	E9_D6_R1	01_Full	F	1e-05	305942	268606	2.68606	4616	1.7185	0.1	0.0372293	0.55	0.204761	4632	1.72446	108.991
S_G_F7	E9_D7_R1	01_Full	G	0	203811	179261	1.79261	2870	1.60102	0.06	0.0334707	0.32	0.178511	2905	1.62054	118.298
S_A_H1	E9_D1_R2	02_Half	A	1	5713878	5437079	54.3708	5312605	97.7106	163.75	3.01173	99.83	1.8361	5320570	97.8571	46.899
S_B_H2	E9_D2_R2	02_Half	B	0.1	1530209	1446942	14.4694	1253099	86.6033	38.31	2.64765	97.88	6.76461	1254859	86.7249	387.992
S_C_H3	E9_D3_R2	02_Half	C	0.01	484112	443768	4.43768	187033	42.1466	5.7	1.28445	74.76	16.8466	187340	42.2158	1189
S_D_H4	E9_D4_R2	02_Half	D	0.001	324424	289516	2.89516	23801	8.22096	0.69	0.238329	20.81	7.18786	23864	8.24272	566.036
S_E_H5	E9_D5_R2	02_Half	E	0.0001	265706	236082	2.36082	5628	2.38392	0.13	0.0550656	3.14	1.33005	5650	2.39324	164.57
S_F_H6	E9_D6_R2	02_Half	F	1e-05	311078	275551	2.75551	4430	1.60769	0.09	0.0326618	0.96	0.348393	4448	1.61422	101.963
S_G_H7	E9_D7_R2	02_Half	G	0	176879	156985	1.56985	2507	1.59697	0.05	0.0318502	0.36	0.229321	2496	1.58996	117.999
S_A_K1	E9_D1_R3	03_Quarter	A	1	5361965	5096728	50.9673	4982563	97.76	154.88	3.03881	99.88	1.95969	4989892	97.9038	46.9227
S_B_K2	E9_D2_R3	03_Quarter	B	0.1	1382144	1305875	13.0587	1135754	86.9726	35.13	2.69015	97.6	7.47392	1137649	87.1178	389.646
S_C_K3	E9_D3_R3	03_Quarter	C	0.01	373011	339628	3.39628	141783	41.7466	4.34	1.27787	65.75	19.3594	142086	41.8358	1177.71
S_D_K4	E9_D4_R3	03_Quarter	D	0.001	267117	236399	2.36399	20672	8.74454	0.59	0.249578	18.38	7.77499	20718	8.764	602.086
S_E_K5	E9_D5_R3	03_Quarter	E	0.0001	228152	200789	2.00789	4866	2.42344	0.11	0.0547839	2.62	1.30485	4868	2.42444	167.299
S_F_K6	E9_D6_R3	03_Quarter	F	1e-05	293741	258310	2.5831	4207	1.62866	0.08	0.0309705	0.67	0.259378	4195	1.62402	103.293
S_G_K7	E9_D7_R3	03_Quarter	G	0	221351	194694	1.94694	3058	1.57067	0.06	0.0308176	0.53	0.272222	3087	1.58557	116.056
S_A_L1	E9_D1_R4	04_Eighth	A	1	4402833	4190232	41.9023	4052821	96.7207	126.47	3.01821	99.73	2.38006	4058963	96.8673	46.4238
S_B_L2	E9_D2_R4	04_Eighth	B	0.1	1424807	1344422	13.4442	1080191	80.3461	33.48	2.49029	96.34	7.1659	1082098	80.488	359.959
S_C_L3	E9_D3_R4	04_Eighth	C	0.01	452119	415522	4.15522	126582	30.4634	3.92	0.943392	61.46	14.791	126786	30.5125	859.402
S_D_L4	E9_D4_R4	04_Eighth	D	0.001	335421	301622	3.01622	15896	5.27017	0.45	0.149193	14.26	4.72777	15936	5.28343	362.866
S_E_L5	E9_D5_R4	04_Eighth	E	0.0001	356959	320881	3.20881	4631	1.44321	0.1	0.0311642	2.13	0.663797	4625	1.44134	99.6302
S_F_L6	E9_D6_R4	04_Eighth	F	1e-05	377599	340649	3.40649	3289	0.96551	0.06	0.0176134	0.39	0.114487	3276	0.961694	61.2345
S_G_L7	E9_D7_R4	04_Eighth	G	0	275720	247554	2.47554	2078	0.839413	0.04	0.0161581	0.24	0.0969485	2115	0.854359	62.0238
S_A_S1	E9_D1_R5	05_Sixteenth	A	1	4983812	4736978	47.3698	4620437	97.5398	144.5	3.05047	99.71	2.10493	4628266	97.705	46.8169
S_B_S2	E9_D2_R5	05_Sixteenth	B	0.1	1052233	995909	9.95909	868912	87.2481	27.26	2.7372	93.5	9.38841	870391	87.3966	390.881
S_C_S3	E9_D3_R5	05_Sixteenth	C	0.01	310932	285076	2.85076	121928	42.7703	3.79	1.32947	54.02	18.9493	122164	42.8531	1206.59
S_D_S4	E9_D4_R5	05_Sixteenth	D	0.001	200096	179100	1.791	15255	8.51759	0.44	0.245673	10.65	5.9464	15292	8.53825	586.46
S_E_S5	E9_D5_R5	05_Sixteenth	E	0.0001	239174	212645	2.12645	4940	2.32312	0.1	0.0470267	1.96	0.921724	4938	2.32218	160.373
S_F_S6	E9_D6_R5	05_Sixteenth	F	1e-05	244107	217273	2.17273	3779	1.73929	0.06	0.027615	0.65	0.299163	3825	1.76046	110.309
S_G_S7	E9_D7_R5	05_Sixteenth	G	0	164710	146295	1.46295	2178	1.48877	0.04	0.027342	0.18	0.123039	2184	1.49287	110.005
U_A_1	E9_D1_R6	06_Unenriched	A	1	1421421	1216840	12.1684	25352	2.08343	0.73	0.0599915	35.55	2.9215	25372	2.08507	NA
U_B_2	E9_D2_R6	06_Unenriched	B	0.1	1466489	1253981	12.5398	2799	0.223209	0.08	0.00637968	4.68	0.373211	2801	0.223369	NA
U_C_3	E9_D3_R6	06_Unenriched	C	0.01	1705219	1464150	14.6415	519	0.0354472	0.01	0.00068299	0.59	0.0402964	518	0.0353789	NA
U_D_4	E9_D4_R6	06_Unenriched	D	0.001	1490963	1253121	12.5312	182	0.0145237	0	0	0.09	0.00718207	186	0.0148429	NA
U_E_5	E9_D5_R6	06_Unenriched	E	0.0001	1894074	1608481	16.0848	233	0.0144857	0.01	0.000621705	0.08	0.00497364	232	0.0144235	NA
U_F_6	E9_D6_R6	06_Unenriched	F	1e-05	2164223	1839235	18.3924	290	0.0157674	0.01	0.000543704	0.08	0.00434963	291	0.0158218	NA
U_G_7	E9_D7_R6	06_Unenriched	G	0	1821277	1544291	15.4429	209	0.0135337	0.01	0.000647546	0.07	0.00453282	214	0.0138575	NA
